1 **Inhibition of CAMKK2 impairs autophagy and castration-resistant prostate cancer**  
2 **via suppression of AMPK-ULK1 signaling**

3

4 Chenchu Lin<sup>1,2\*</sup>, Alicia M. Blessing<sup>3,4,5\*</sup>, Thomas L. Pulliam<sup>1,4,5</sup>, Yan Shi<sup>4</sup>, Sandi R.  
5 Wilkenfeld<sup>1,2</sup>, Jenny J. Han<sup>1</sup>, Mollianne M. Murray<sup>1</sup>, Alexander H. Pham<sup>4</sup>, Kevin Duong<sup>2</sup>,  
6 Sonja N. Brun<sup>6</sup>, Reuben J. Shaw<sup>6</sup>, Michael M. Ittmann<sup>7,8,9</sup>, and Daniel E. Frigo<sup>1,4,5,10,11#</sup>

7

8 <sup>1</sup>Department of Cancer Systems Imaging, The University of Texas MD Anderson Cancer  
9 Center, Houston, Texas, USA; <sup>2</sup>The University of Texas MD Anderson Cancer Center  
10 UTHealth Graduate School of Biomedical Sciences, Houston, Texas, USA; <sup>3</sup>Department  
11 of Experimental Therapeutics, The University of Texas MD Anderson Cancer Center,  
12 Houston, Texas, USA; <sup>4</sup>Center for Nuclear Receptors and Cell Signaling, University of  
13 Houston, Houston, Texas, USA; <sup>5</sup>Department of Biology and Biochemistry, University of  
14 Houston, Houston, Texas, USA; <sup>6</sup>Molecular and Cell Biology Laboratory, The Salk  
15 Institute for Biological Studies, La Jolla, California, USA; <sup>7</sup>Departments of Pathology and  
16 Immunology, Baylor College of Medicine, Houston, TX, USA; <sup>8</sup>Dan L. Duncan Cancer  
17 Center, Houston, TX, USA; <sup>9</sup>Michael E. DeBakey Veterans Affairs Medical Center,  
18 Houston, TX, USA; <sup>10</sup>Department of Genitourinary Medical Oncology, The University of  
19 Texas MD Anderson Cancer Center, Houston, Texas, USA; <sup>11</sup>The Houston Methodist  
20 Research Institute, Houston, Texas, USA

21

22 \*These authors contributed equally to this work.

23 #Corresponding author: Daniel E. Frigo, Department of Cancer Systems Imaging, The  
24 University of Texas MD Anderson Cancer Center, 1881 East Road, 3SCR4.3618 - Unit  
25 1907, Houston, TX 77054. E-mail address: [frigo@mdanderson.org](mailto:frigo@mdanderson.org).

26

27 **Key Words:** prostate cancer, autophagy, CAMKK2, AMPK, ULK1, androgen, androgen  
28 receptor (AR)

29

30 **Short Title:** CAMKK2 promotes autophagy and CRPC via AMPK and ULK1

31

32

### 33 **Abstract**

34 Previous work has suggested androgen receptor (AR) signaling mediates cancer  
35 progression in part through the modulation of autophagy. Accordingly, we demonstrate  
36 that chloroquine, an inhibitor of autophagy, can inhibit tumor growth in preclinical mouse  
37 models of castration-resistant prostate cancer (CRPC). However, clinical trials testing  
38 chloroquine derivatives in men with CRPC have yet to yield promising results, potentially  
39 due to side effects. We hypothesized that identification of the upstream activators of  
40 autophagy in prostate cancer could highlight alternative, context-dependent targets for  
41 blocking this important cellular process during disease progression. Here, we used  
42 molecular (inducible overexpression and shRNA-mediated knockdown), genetic  
43 (CRISPR/Cas9), and pharmacological approaches to elucidate an AR-mediated  
44 autophagy cascade involving Ca<sup>2+</sup>/calmodulin-dependent protein kinase kinase 2  
45 (CAMKK2; a kinase with a restricted expression profile), 5'-AMP-activated protein kinase  
46 (AMPK) and Unc-51 like autophagy activating kinase 1 (ULK1). These findings are  
47 consistent with data indicating CAMKK2-AMPK-ULK1 signaling correlates with disease  
48 progression in genetic mouse models and patient tumor samples. Importantly, *CAMKK2*  
49 disruption impaired tumor growth and prolonged survival in multiple CRPC preclinical  
50 mouse models. Finally, we demonstrate that, similar to CAMKK2 inhibition, a recently  
51 described inhibitor of AMPK-ULK1 signaling blocked autophagy, cell growth and colony  
52 formation in prostate cancer cells. Taken together, our findings converge to demonstrate  
53 that AR signaling can co-opt the CAMKK2-AMPK-ULK1 signaling cascade to promote  
54 prostate cancer by increasing autophagy. Further, we propose that an inhibitor of this  
55 signaling cascade could serve as an alternative, more specific therapeutic compared to

56 existing inhibitors of autophagy that, to date, have demonstrated limited efficacy in clinical  
57 trials due to their toxicity and poor pharmacokinetics.

58

## 59 **Introduction**

60 Prostate cancer is the second leading cause of cancer mortality among men in the United  
61 States(1). While most prostate cancers can be treated effectively with surgery and/or  
62 radiation, a significant number of men present with *de novo* metastatic disease or  
63 progress following initial treatment. The standard of care for advanced prostate cancer is  
64 androgen deprivation therapy (ADT) due to the central role of the androgen receptor (AR)  
65 in almost all prostate cancers(2). Although ADT is initially effective in slowing the cancer,  
66 it invariably fails within 2-3 years, after which the disease progresses to a stage referred  
67 to as castration-resistant prostate cancer (CRPC). There is currently no cure for CRPC.  
68 Interestingly, despite the failure of ADT in CRPC, the overwhelming majority of prostate  
69 cancers are still driven by AR as a result of a variety of AR reactivation mechanisms (ex.  
70 increased intratumoral androgen synthesis, *AR* gene and enhancer amplifications, splice  
71 variants, etc)(2). As such, AR and processes downstream of the receptor remain viable  
72 therapeutic targets in CRPC.

73

74 In an effort to identify downstream effectors of AR signaling in prostate cancer, we  
75 demonstrated *CAMKK2*, encoding the Ca<sup>2+</sup>/calmodulin-dependent protein kinase kinase  
76 2 (*CAMKK2*) protein, to be a direct AR target gene in prostate cancer(3). These data were  
77 soon validated by several other groups(4-6). *CAMKK2* expression correlated with both

78 initial response to ADT and transition to CRPC in multiple clinical cohort tissue  
79 microarrays (TMAs)(4). In addition, CAMKK2 tracked with Gleason grade and was  
80 elevated in different genetically engineered mouse models (GEMMs) of prostate  
81 cancer(5, 7). The specific AR binding site we first identified that regulates *CAMKK2*  
82 expression(3) was later confirmed by others and shown to be one of the most robust AR  
83 binding sites in CRPC patient samples(6). Functionally, CAMKK2 is required for  
84 maximum AR-mediated prostate cancer cell growth, migration and invasion in cell culture  
85 and tumor growth in xenograft and GEMMs(3-5, 7, 8).

86

87 Androgens, in a CAMKK2-dependent manner, increased the phosphorylation of AMP-  
88 activated protein kinase (AMPK) on threonine-172 of its  $\alpha$  catalytic subunit's activation  
89 loop. Threonine-172 p-AMPK levels correlated with prostate cancer relative to benign  
90 prostatic tissue and were further elevated in biochemically recurrent disease(9).  
91 Importantly, we previously demonstrated that many of the pro-cancer effects of CAMKK2  
92 in prostate cancer are mediated through the activation of AMPK(3). Accordingly,  
93 knockdown of AMPK impaired AR-mediated prostate cancer cell growth(9). These data  
94 indicate that AR-CAMKK2 signaling can promote prostate cancer in part through AMPK,  
95 a known regulator of macroautophagy(10).

96

97 Macroautophagy, herein referred to as autophagy, is a highly conserved process whereby  
98 cellular components are captured and delivered to a double membrane vesicle known as  
99 an autophagosome, and subsequently degraded by the lysosomal system(11).

100 Autophagy can function as a survival mechanism in response to stress by recycling the  
101 lysosomal breakdown products towards essential processes. Autophagy can also serve  
102 as a cellular quality control mechanism by removing damaged organelles and toxins.  
103 Therefore, autophagy is of importance in physiological processes as well as diseases  
104 such as cancer(12). However, the role of autophagy in cancer is complicated and context  
105 dependent(13-18). For example, autophagy can protect cells and tissues from damage  
106 and impair malignant transformation(19, 20). Conversely, in more advanced cancers,  
107 autophagy can enable cells to evade apoptosis in hypoxic and nutrient-deficient  
108 environments as well as promote drug resistance(21-24). In prostate cancer, studies from  
109 our laboratory and others using cell lines, xenografts and genetic mouse models indicate  
110 that autophagy can promote disease progression(25-32). These preclinical data provided  
111 the rationale for a series of clinical trials (NCT04011410, NCT00726596, NCT00786682,  
112 NCT03513211, NCT01828476, NCT02421575, NCT01480154) that tested the efficacy  
113 of chloroquine derivatives such as hydroxychloroquine in men with prostate cancer(33).  
114 Chloroquine and hydroxychloroquine were chosen because they 1) are already FDA-  
115 approved for the treatment of malaria and rheumatological disorders and 2) have been  
116 demonstrated to impair autophagic flux by increasing lysosomal pH and decreasing  
117 autophagosome-lysosome fusion(34, 35). Hence, chloroquine and hydroxychloroquine  
118 represented potential clinical grade inhibitors of autophagy that could be rapidly  
119 repurposed for the treatment of cancer. To date, however, these trials, as well as similar  
120 trials in other tumors types, have yielded mixed results(15). To that end, a major challenge  
121 has been achieving high enough concentrations of chloroquine or hydroxychloroquine in  
122 patients to consistently block autophagy without major side effects(16). The chloroquine-

123 mediated side effects may in part be due to the mechanism of action of this drug.  
124 Chloroquine-like compounds inhibit autophagy by blocking the late lysosomal step. Since  
125 lysosomal function is required for processes beyond autophagy, this indicates that  
126 chloroquine is not specific for autophagy. Hence, we speculate that targeting other steps  
127 in autophagy could provide an improved therapeutic window.

128

129 We previously demonstrated that androgens, in an AR-dependent manner could increase  
130 autophagy and autophagic flux through multiple mechanisms(25, 26). These included  
131 indirect activation of autophagy through increases in reactive oxygen species (ROS) and  
132 the expression of several core components of the autophagic machinery. Given AMPK's  
133 known link to autophagy(36-38) and our previous findings that AR could increase AMPK  
134 activity in a CAMKK2-dependent manner(3, 8), we sought to determine whether the  
135 increased CAMKK2 observed in AR+ prostate cancer could be driving disease  
136 progression in part through activating autophagy. We also reasoned that delineation of  
137 this signaling cascade, combined with the restricted expression profile of CAMKK2 and  
138 tolerance for its systemic inhibition in mice(39, 40), could nominate alternative ways to  
139 safely block autophagy in men with prostate cancer.

140

## 141 **Results**

### 142 **Chloroquine impairs CRPC xenograft growth**

143 To initially assess the effect of chloroquine in a preclinical model of CRPC, castrated NSG  
144 mice were injected with CRPC 22Rv1 cells stably expressing firefly luciferase (22Rv1-

145 fLuc). When tumors became palpable, mice were randomized to PBS/control and  
146 chloroquine treatment groups (Fig. 1A). The tumors were monitored by bioluminescence  
147 imaging (BLI) and caliper measurements until the maximum allowable size. In the first  
148 two weeks, the BLI clearly showed inhibition of tumor growth by chloroquine (Fig. 1B).  
149 However, the bioluminescence intensity lost its sensitivity once the tumors grew large  
150 (data not shown), which likely resulted from a lack of oxygen or necrosis in the center of  
151 the large tumors. Despite this, the tumor volume demonstrated that chloroquine treatment  
152 decreased tumor growth rate (Fig. 1C). The decreased tumor growth rate corresponded  
153 to a prolonged survival (Fig. 1D). Compared to the vehicle group, fewer cell nuclei were  
154 stained by hematoxylin (Fig. 1E). The reduced tumor growth appeared to be a product of  
155 reduced proliferation and increased apoptosis as assessed by BrdU and TUNEL staining,  
156 respectively (Fig. 1E). These observations suggest that inhibiting autophagy using  
157 chloroquine can reduce proliferation and increase apoptosis, ultimately decreasing CRPC  
158 growth and prolonging survival.

159

160 **Fig 1. Chloroquine inhibits castration-resistant prostate cancer (CRPC) growth *in***  
161 ***vivo*.**

162 (A) Schematic of xenograft study using CRPC 22Rv1-fLuc cells in castrated NSG mice  
163 treated via intraperitoneal injections (IP) once/day, 6 days/week with vehicle (PBS) or 60  
164 mg/kg/day chloroquine (PBS: n=6, chloroquine: n=7). (B) Bioluminescence imaging of six  
165 representative mice bearing tumors. PBS = vehicle. (C) Tumor growth curves of 22Rv1-  
166 fLuc xenograft mice treated with vehicle (PBS) or chloroquine. *P* values were calculated  
167 using two-way ANOVA. (D) Kaplan-Meier survival curve of 22Rv1-luc xenograft mice  
168 following chloroquine treatment. *P* value was calculated using log-rank test. (E) H&E,



169 BrdU and TUNEL staining in the xenograft tumors (*top*). Quantification of BrdU and  
170 TUNEL staining (*bottom*). *P* values were calculated using two-tailed *t* test. \**P* < 0.05, \*\**P*  
171 < 0.01.

172

### 173 **CAMKK2 promotes autophagy and autophagic flux in prostate cancer**

174 Although chloroquine derivatives have been tested in cancer clinical trials, the high  
175 dosage needed in patients to maintain autophagy inhibition remains a challenge that limits  
176 the therapeutic window of this class of compounds. We propose that targeting upstream  
177 regulators of autophagy may offer safer, alternative options for inhibiting autophagy.  
178 *CAMKK2* has previously been shown to be a direct transcriptional target of AR in prostate  
179 cancer that promotes the phosphorylation and activation of AMPK(3, 9). Given the critical  
180 role of AMPK in autophagy(10, 37, 38, 41), we investigated whether *CAMKK2* augmented  
181 autophagy in prostate cancer. To do this, we first engineered hormone-sensitive LNCaP  
182 cells to inducibly express *CAMKK2* in the presence of doxycycline (DOX) (LNCaP-  
183 *CAMKK2*). We then examined via immunoblot the effect of *CAMKK2* overexpression on  
184 AMPK phosphorylation and the accumulation of phosphatidylethanolamine-conjugated  
185 LC3B (LC3BII), a marker of autophagy (Fig. 2A). *CAMKK2* overexpression increased p-  
186 AMPK and conversion of LC3BI to LC3BII (Fig. 2A). Likewise, *CAMKK2* overexpression  
187 increased GFP-LC3 puncta formation, indicative of increased autophagosome formation  
188 (Fig. 2B). To further confirm the effects on autophagy, transmission electron microscopy  
189 (TEM) was used to verify the increased number of autophagic vesicles (autophagosomes  
190 and autophagolysosomes) following *CAMKK2* expression (Fig. 2C). Given the high  
191 expression of *CAMKK2* in AR+ CRPC(3, 4, 6, 42), we next knocked out *CAMKK2* in C4-

192 2 cells, an LNCaP-derived CRPC model, using CRISPR-Cas9 to assess the effects of  
193 *CAMKK2* disruption in CRPC. Two *CAMKK2* knockout (KO) clones were selected  
194 (Supplementary Figs. S1A-B) and compared to control (Cas9 only) cells to examine  
195 effects on autophagy (Figs. 2D-F). Both *CAMKK2* KO clones exhibited substantially  
196 reduced AMPK phosphorylation and LC3B conversion (Fig. 2D) as well as decreased  
197 LC3 puncta (Fig. 2E). Compared to control C4-2 Cas9 cells, it was also difficult to find  
198 autophagic vesicles in *CAMKK2* knockout cells by TEM (Fig. 2F). However, apoptotic  
199 bodies were clearly detectable (Fig. 2F). We confirmed the effects of *CAMKK2* inhibition  
200 on autophagy using an independent model of CRPC, 22Rv1 cells, in which we created a  
201 stable derivative that could express shRNA targeting *CAMKK2* in the presence of DOX.  
202 Similar to *CAMKK2* genetic KO in C4-2 cells, the inducible knockdown of *CAMKK2* in  
203 22Rv1 cells inhibited autophagy (Figs. 2G-I).

204

205 **Fig 2. *CAMKK2* increases autophagy in prostate cancer cells.**

206 (A) Immunoblot analysis of doxycycline (DOX)-inducible LNCaP stable cells (LNCaP-  
207 *CAMKK2*) that express *CAMKK2* upon addition of 50 ng/ml DOX for 48 hours. (B)  
208 LNCaP-*CAMKK2* cells were transiently transfected with GFP-LC3 (green) and then  
209 treated  $\pm$  50 ng/ml DOX for 48 hours. Representative images (*top*). GFP-LC3 puncta  
210 (green) were quantified as the average number of GFP-LC3 puncta per cell  $\pm$  SEM  
211 (*bottom*). The nuclei are stained with DAPI (blue) for reference. *P* value was calculated  
212 using a two-tailed *t* test. \**P* < 0.05. (C) LNCaP-*CAMKK2* cells were treated  $\pm$  50 ng/ml  
213 DOX for 48 hours and imaged using transmission electron microscopy (TEM). Two  
214 magnifications of ultrastructures are shown. Blue arrows indicate autophagosomes and

215 autolysosomes. (D) Immunoblot analysis of two independent clones of CRISPR-modified  
216 C4-2 *CAMKK2* knockout (KO) cells compared with their parental C4-2 Cas9 control cells  
217 (Ctrl). (E) GFP-LC3 was expressed in C4-2 Cas9 control and *CAMKK2* KO cell  
218 derivatives. GFP-LC3 puncta (representative images; *top*) and quantification (*bottom*) are  
219 shown as in B. (F) C4-2 control and C4-2 *CAMKK2* KO cells were imaged using TEM as  
220 in C. Red arrows indicate apoptotic bodies. (G) Immunoblot analysis of DOX-inducible  
221 22Rv1 stable cells that express shRNA targeting *CAMKK2* (22Rv1-sh*CAMKK2*) with 800  
222 ng/ml DOX treatment for 72 hours. (H) 22Rv1-sh*CAMKK2* cells were transiently  
223 transfected with GFP-LC3 and then treated  $\pm$  800 ng/ml DOX for 72 hours. GFP-LC3  
224 puncta (representative images; *top*) and quantification (*bottom*) are shown as in B. (I)  
225 22Rv1-sh*CAMKK2* cells were treated  $\pm$  800 ng/ml DOX for 72 hours and imaged with  
226 TEM as in C.

227

228 **Supplementary Figure S1.** (A) sgRNAs targeting *CAMKK2* were expressed in C4-2  
229 inducible Cas9 cells and single cell clones were selected after DOX (200 ng/ml)  
230 treatment. Immunoblot analysis of these clones and their parental C4-2 Cas9 cells. Note,  
231 the clone numbers here were matched for clarity with the numbering throughout the main  
232 text and figures. (B) Sanger sequence of C4-2 Cas9 cells and its derivatives *CAMKK2*  
233 KO clone 1 and clone 2. Red dashes and letters indicate the identified mutations.

234

235 There are several sequential steps involved in autophagy, including initiation,  
236 autophagosome formation, autolysosome fusion and degradation. Hence, *CAMKK2*-

237 mediated increases in LC3 lipidation and relocalization could result from either increased  
238 autophagic entry or decreased autophagic flux(25). We therefore used a tandem  
239 mCherry-GFP-LC3B fusion protein to evaluate CAMKK2's role in autophagic flux. LC3B  
240 fusion protein is represented as a yellow signal due to the equal expression of both  
241 mCherry and GFP basally (diffuse signal) and during early autophagy/prelysosomal  
242 fusion (puncta). However, after lysosomal fusion (late autophagy), the acidic environment  
243 of the lysosome quenches the GFP signal but retains mCherry, resulting in the  
244 colorimetric shift from yellow to red. Consistent with our previous studies(25, 26),  
245 androgens increased overall LC3B puncta and GFP<sup>-</sup>mCherry<sup>+</sup> LC3B puncta (red) (Fig.  
246 3A). We also observed that *CAMKK2* overexpression has a similar result as androgen  
247 treatment, which significantly elevated total and red puncta (Fig. 3A). This indicates that  
248 CAMKK2, an AR target, can promote autophagic flux similar to androgen treatment. To  
249 further validate these findings, we used a lysosomal block assay(25). As described above,  
250 chloroquine is a lysosomotropic agent that can block the lysosomal turnover of LC3B.  
251 Therefore, impairment of autophagic flux would decrease or not alter LC3BII  
252 accumulation in the presence of chloroquine. In contrast, we observed androgens or  
253 CAMKK2 expression further increased LC3BII levels in the presence of a lysosomal  
254 block, while knockdown of *CAMKK2* decreased LC3B conversion (Fig. 3B and  
255 Supplementary Fig. S2), suggesting that CAMKK2 enhanced autophagic flux by  
256 increasing autophagy initiation.

257

258 **Fig 3. CAMKK2 promotes autophagic flux.**

259 (A) LNCaP-CAMKK2 cells were transfected with an mCherry-GFP-LC3 plasmid and  
260 treated  $\pm$  10 nM R1881 (androgen)  $\pm$  50 ng/ml DOX. Representative fluorescence images  
261 of the cellular localization of autophagic puncta (*top*) and quantification (*bottom*). *P* values  
262 were calculated using one-way ANOVA with Dunnett's test. \**P* < 0.05, \*\**P* < 0.01,  
263 compared to vehicle group in total. #*P* < 0.05, ##*P* < 0.01, compared to vehicle group in  
264 GFP-mCherry+. (B) LNCaP-CAMKK2 cells were treated  $\pm$  10 nM R1881 (androgen)  $\pm$  50  
265 ng/ml DOX  $\pm$  20  $\mu$ M chloroquine (lysosomal block) for 72 hours. Cell lysates were then  
266 subjected to immunoblot analysis.

267

268 **Figure S2.** Immunoblot analysis of 22Rv1-shCAMKK2 cells  $\pm$  800 ng/ml DOX  $\pm$  20  $\mu$ M  
269 chloroquine treatment for 72 hours.

270

### 271 **CAMKK2 is required for CRPC cell growth *in vivo***

272 Previous studies using the pharmacological inhibitor STO-609 have suggested the  
273 potential role of CAMKK2 in CRPC growth(4). However, STO-609 has multiple kinase  
274 targets(43-45). Here, we used a genetic approach to assess the role of CAMKK2 in CRPC  
275 tumorigenesis and progression *in vivo*. Castrated NSG mice were subcutaneously  
276 injected with C4-2 Cas9 control and C4-2 CAMKK2 KO cells (Fig. 4A). CAMKK2 ablation  
277 had a profound effect on CRPC tumor growth (Fig. 4B). In fact, when the average tumor  
278 size of the control group was  $\sim$ 500 mm<sup>3</sup>, no tumors could even be detected in the KO  
279 groups. Accordingly, CAMKK2 KO also dramatically prolonged survival (Fig. 4C).  
280 Immunohistochemical (IHC) analysis of tumor tissues determined both a reduction in

281 proliferation and increase in apoptosis in *CAMKK2* KO groups compared to control (Fig.  
282 4D). To validate our findings in a second model of CRPC and test what would happen if  
283 we decreased *CAMKK2* after tumor implantation, we leveraged our DOX-inducible  
284 22Rv1-sh*CAMKK2* cell model (Fig. 4E and Supplementary Fig. S3A-B). Consistent with  
285 the C4-2 *CAMKK2* KO xenograft results, knockdown of *CAMKK2* in 22Rv1 tumors  
286 decreased tumor burden over time and consequently increased overall survival (Figs. 4F-  
287 G). Moreover, *CAMKK2* knockdown-mediated tumor growth reduction was again  
288 correlated to lower proliferation (BrdU) and more apoptosis (TUNEL) (Fig. 4H). Consistent  
289 with a pro-survival role of *CAMKK2*-mediated autophagy, we also observed inducible  
290 *CAMKK2* knockdown tumors displayed increased necrosis, but clear regions of  
291 perivascular tumor sparing (Fig. 4H, +DOX H&E (high magnification)). Collectively, these  
292 data suggest that *CAMKK2* is required for maximum CRPC tumorigenesis and  
293 progression *in vivo*, potentially by enabling cells to withstand the harsh, nutrient-deficient  
294 tumor microenvironment.

295

296 **Fig 4. *CAMKK2* is required for CRPC tumor growth *in vivo*.**

297 (A) Schematic of xenograft study using CRPC C4-2 Cas9 control and *CAMKK2* CRISPR  
298 knockout (KO) cell derivatives in castrated NSG mice. (B) Tumor growth curves of C4-2  
299 Cas9 control and C4-2 *CAMKK2* KO xenografts in castrated NSG mice (n = 10/group). *P*  
300 values were calculated using two-way ANOVA. (C) Kaplan-Meier survival curve of C4-2  
301 Cas9 control and C4-2 *CAMKK2* KO xenograft mice. *P* values were calculated using the  
302 log-rank test. (D) C4-2 xenograft tumor samples were stained with H&E, BrdU and  
303 TUNEL. Representative images (*left*) and quantifications of BrdU and TUNEL staining

304 (right). \* $P < 0.05$ , \*\* $P < 0.01$  by one-way ANOVA with Dunnett's test. (E) Schematic of  
305 xenograft study using DOX-inducible CRPC 22Rv1-shCAMKK2 cells in castrated NSG  
306 mice. (F) Tumor growth curves of 22Rv1-shCAMKK2 xenografts in castrated NSG mice  
307 fed control or DOX-enriched (625 mg/kg) chow.  $P$  value was calculated using two-way  
308 ANOVA. (G) Kaplan-Meier survival curve of 22Rv1-shCAMKK2 xenograft mice  $\pm$  DOX.  $P$   
309 value was calculated using the log-rank test. (H) 22Rv1-shCAMKK2 xenograft tumor  
310 samples were stained with H&E, BrdU and TUNEL. Representative images (left) and  
311 quantifications of BrdU and TUNEL staining (right). Note, evidence of perivascular tumor  
312 sparing in DOX-treated tumors (H&E high magnification (mag.)). \*\* $P < 0.01$  by  $t$  test.

313

314 **Figure S3.** (A) Fluorescence imaging of 5 sample mice (3 on normal chow, 2 on DOX-  
315 containing chow) confirming the CAMKK2 shRNA expression. (B) Immunoblot analysis  
316 of tumors from 22Rv1-shCAMKK2 xenograft mice  $\pm$  DOX.

317

### 318 **AR-CAMKK2-AMPK signaling enhanced autophagy through phosphorylation of** 319 **ULK1 at serine 555**

320 Since AR-CAMKK2 signaling promotes autophagic flux, we further explored the  
321 mechanism by which it initiated autophagy. A key protein involved in autophagy initiation  
322 is the serine/threonine protein kinase Unc-51 like autophagy activating kinase 1 (ULK1),  
323 which functions as part of a complex to transduce upstream signals to the downstream  
324 core autophagy machinery(46). AMPK is a known ULK1 upstream regulator by  
325 phosphorylating and activating ULK1 at multiple sites in a context dependent-manner(47-

326 49). Thus, we speculated that AR-CAMKK2 activated autophagy through ULK1 in  
327 prostate cancer. To explore this possibility, we co-treated LNCaP cells with androgens  
328 and the CAMKK2 inhibitor STO-609. Androgens increased the levels of CAMKK2, p-  
329 AMPK and LC3BII, an effect that could be abrogated by STO-609 (Fig. 5A). Androgens  
330 also increased ULK1 phosphorylation at serine 555, an effect that was again reversed by  
331 STO-609 (Fig. 5A). This was of interest because serine 555 has been shown to be a  
332 critical phosphorylation site necessary for AMPK-mediated autophagy *in vitro* and *in vivo*  
333 (47, 50-52). To exclude the non-specific effects of STO-609, we next tested p-  
334 ULK1(S555) status in cells following genetic or molecular modification of CAMKK2 and  
335 AMPK. In LNCaP-CAMKK2 cells, DOX alone increased CAMKK2 expression level,  
336 resulting in a similar increase in p-AMPK, p-ULK1 and LC3BII levels compared to  
337 androgen treatment alone (Fig. 5B). These increases could be reversed upon knockdown  
338 of AMPK $\alpha$ 1, the predominant AMPK  $\alpha$  catalytic subunit in prostate cancer(3, 9, 53, 54).  
339 The requirement for AMPK was confirmed with three independent siRNAs (Fig. 5C). To  
340 verify that ULK1 phosphorylation was necessary for CAMKK2-mediated autophagy, we  
341 transfected LNCaP-CAMKK2 cells with constructs expressing vector control, WT ULK1  
342 or ULK1 4SA mutant, an AMPK non-phosphorylatable ULK1(47). Cells treated with DOX  
343 (CAMKK2 expression) and expressing WT ULK1 had increased LC3BII levels, indicating  
344 an increase of autophagy, while 4SA mutant blocked CAMKK2-mediated autophagy (Fig.  
345 5D). The requirement of CAMKK2 for AMPK-ULK1-mediated autophagy was confirmed  
346 in both the C4-2 and 22Rv1 CRPC models (Figs. 5E-F). Taken together, these findings  
347 demonstrated that AR-CAMKK2 triggers AMPK phosphorylation and activation, and in  
348 turn phosphorylates ULK1 at serine 555, which ultimately stimulates autophagy.



349

350 **Fig 5. AR-CAMKK2-AMPK signaling increases autophagy by phosphorylating**  
351 **ULK1 at serine 555.**

352 (A) LNCaP cells were treated  $\pm$  10 nM R1881 (androgen)  $\pm$  30  $\mu$ M STO-609 for 72 hours.  
353 (B) LNCaP-CAMKK2 cells were transfected with siRNAs targeting scramble control or the  
354  $\alpha$ 1 catalytic subunit of AMPK (siAMPK) and then treated with androgen for 72 hours or  
355 DOX (50 ng/ml) for 48 hours. Cell lysates were subjected to immunoblot analysis. (C)  
356 Parental LNCaP cells were transfected with siRNAs targeting scramble control or three  
357 different regions of the  $\alpha$ 1 catalytic subunit of AMPK (siAMPK) and then treated with  
358 vehicle or androgen for 72 hours. Cell lysates were subjected to immunoblot analysis. (D)  
359 LNCaP-CAMKK2 cells were transfected with empty vector, ULK1 or ULK1 (4SA)  
360 expression constructs and then treated  $\pm$  DOX for 48 hours. Cell lysates were subjected  
361 to immunoblot analysis. (E) Immunoblot analysis of C4-2 Cas9 control and CAMKK2 KO  
362 derivative cells treated with vehicle or chloroquine (20  $\mu$ M). (F) Immunoblot analysis of  
363 22Rv1-shCAMKK2 cells  $\pm$  800 ng/ml DOX treatment for 72 hours.

364

365 **ULK1 correlates with poor patient prognosis in men with prostate cancer**

366 To examine the clinical association between ULK1 and patient prognosis, we analyzed  
367 two well-annotated, publicly available patient databases. The expression level of *ULK1*  
368 mRNA was inversely correlated with disease-free survival in both TCGA(55) (Fig. 6A) and  
369 Taylor *et al.* 2010(56) (Fig. 6B) clinical cohorts. Consistent with these clinical correlations,  
370 previous histological studies have linked high ULK1 levels to biochemical recurrence and

371 PSA levels(57, 58). Taken together, these data suggest that high ULK1 may promote  
372 disease progression.

373

374 **Fig 6. High *ULK1* tumor expression predicts poor patient prognosis in**  
375 **independent clinical cohorts of men with prostate cancer.**

376 Kaplan-Meier estimates of disease-free survival in The Cancer Genome Atlas (TCGA)  
377 and Taylor *et al.* 2010 clinical cohorts based on *ULK1* expression. Data were generated  
378 from cBioPortal.

379

380 **Pharmacological targeting of ULK1 inhibits prostate cancer cell growth**

381 We next wanted to determine if ULK1 was a potential therapeutic target in prostate  
382 cancer. To test this, we leveraged SBI-0206965 (6965), a recently described ULK1  
383 inhibitor that has shown anti-cancer effects in lung cancer cells under nutrient deprivation  
384 (Fig. 7A)(59). To validate 6965's antagonistic effects in prostate cancer cells, we first used  
385 the known ULK1 substrate VPS34 to determine whether 6965 could block ULK1 activity.  
386 6965 decreased both basal and androgen-induced phosphorylation of VPS34 at serine  
387 249, in alignment with the reduction of LC3BII (Fig. 7B). In 22Rv1 cells, 6965 also resulted  
388 in inhibition of p-VPS34 and LC3BII accumulation (Supplementary Fig. S4). Interestingly,  
389 we noticed an increase of p-AMPK after 6965 treatment, consistent with the previously  
390 described negative feedback loop that exists between ULK1 and AMPK(60). Next, to  
391 assess the efficacy of 6965 on prostate cancer cell growth, we treated LNCaP-CAMKK2  
392 cells with androgens, DOX and/or 6965 for 7 days. Although 6965 did not significantly

393 inhibit basal LNCaP cell growth, it blocked androgen- and/or DOX-mediated LNCaP cell  
394 growth (Fig. 7C), consistent with our previous findings that siRNA-mediated knockdown  
395 of ULK1 blocked androgen-mediated cell growth(26). Interestingly, the LNCaP-derived  
396 CRPC derivative C4-2 cells were more sensitive to 6965 treatment, showing a ~70%  
397 reduction in growth (Fig. 7D). In 22Rv1 cells, ~50% growth inhibition was observed (Fig.  
398 7E). To evaluate the long-term effects of 6965 on cell proliferation, we performed  
399 clonogenic assays. All three cells were very sensitive to prolonged 6965 treatment with  
400 almost 100% inhibition in clonogenic potential (Figs. 7F-H). Collectively, these data  
401 indicate that ULK1 is a potentially druggable target for the treatment of prostate cancer.  
402 Future studies would need to explore the safety of such an approach *in vivo*.

403

404 **Fig 7. The ULK1 inhibitor SBI-0206965 represses prostate cancer cell growth.**

405 (A) Chemical structure of the ULK1 inhibitor SBI-0206965. (B) LNCaP cells were  
406 transfected with VPS34-FLAG following 72 hours 10 nM R1881 (androgen) treatment.  
407 Cell lysates were collected 2 hours after vehicle or SBI-0206965 (10  $\mu$ M) treatment and  
408 subjected to immunoblot analysis. (C) Cell growth of LNCaP-CAMKK2 cells following 7  
409 days R1881 (androgen, 10 nM), DOX (50 ng/ml) and/or SBI-0206965 (10  $\mu$ M) treatment.  
410 \* $P$  < 0.05, \*\* $P$  < 0.01 compared to no androgen/DOX/SBI-0206965 treatment group. # $P$   
411 < 0.05, ## $P$  < 0.01, compared to corresponding vehicle (SBI-0206965) treatment group.  
412 (D) Cell growth of C4-2 Cas9 control and C4-2 CAMKK2 KO derivative cells  $\pm$  SBI-  
413 0206965 (10  $\mu$ M). \*\* $P$  < 0.01 compared to C4-2 control cells. ## $P$  < 0.01, compared to  
414 vehicle treatment group. (E) Cell growth of 22Rv1-shCAMKK2 cells treated for 7 days  $\pm$   
415 DOX (800 ng/ml)  $\pm$  SBI-0206965 (10  $\mu$ M). \* $P$  < 0.05, \*\* $P$  < 0.01 compared to no DOX

416 treatment group.  $###P < 0.01$ , compared to corresponding vehicle (SBI-0206965) treatment  
417 group. (F) Colony formation assay of LNCaP-CAMKK2 cells following 28-day DOX and/or  
418 SBI-0206965 (10  $\mu$ M) under 100 pM R1881 (androgen) treatment (required for LNCaP  
419 colony formation). Representative image (*left*). Quantification (*right*). (G) Colony  
420 formation assay of C4-2 Cas9 control and C4-2 CAMKK2 KO derivative cells  $\pm$  SBI-  
421 0206965 (10  $\mu$ M) for 21 days. Representative image (*left*). Quantification of three  
422 independent experiments (*right*).  $**P < 0.01$ , compared to C4-2 control vehicle treatment  
423 group. (H) Colony formation assay of 22Rv1-shCAMKK2 cells treated for 21 days  $\pm$  DOX  
424 (800 ng/ml) or SBI-0206965 (10  $\mu$ M). Representative image (*left*). Quantification of three  
425 independent experiments (*right*).  $*P < 0.05$ ,  $**P < 0.01$ , compared to vehicle treatment  
426 group.

427

428 **Figure S4.** 22Rv1 cells were transfected  $\pm$  VPS34-FLAG for 48 hours. Immunoblot  
429 analysis of transfected cells with 2 hours SBI-0206965 (10  $\mu$ M) treatment.

430

## 431 **Discussion**

432 Although autophagy has context-dependent roles in cancer (18, 61-64), our data support  
433 a pro-cancer role for this cellular process in prostate cancer. These findings are consistent  
434 with our previous work(25, 26) and the work of others in the field(27, 28, 63, 65-67). As  
435 presented in our previous reports, blocking autophagy by molecular or pharmacological  
436 approaches resulted in decreased androgen-mediated prostate cancer cell growth(25,  
437 26). Mechanistically, androgens stimulate AR to promote autophagy through multiple

438 mechanisms including the indirect accumulation of intracellular ROS and more directly  
439 through the transcription of several core autophagy genes(25, 26). In this study, we  
440 revealed a novel mechanism underlying how AR regulates autophagy. Our data  
441 demonstrated that an AR-CAMKK2-AMPK signaling cascade can drive autophagy  
442 through the phosphorylation of ULK1, an important initiator of autophagy, at serine 555.  
443 This phosphorylation activates the ULK1 complex and ultimately initiates autophagy and  
444 autophagic flux for prostate cancer cell proliferation and survival (Fig. 8). This finding not  
445 only provides a novel mechanistic insight into AR's regulation of autophagy, but highlights  
446 potential new avenues for therapeutic targeting of autophagy in prostate cancer. A non-  
447 AR-mediated regulation of autophagy has been reported as a resistance mechanism to  
448 treatment with the anti-tumor compound triptolide in prostate cancer(68). As a result,  
449 chloroquine was applied to overcome triptolide resistance, enhancing the anti-tumor  
450 effect of triptolide in much the same way chloroquine enhanced the effect of hormone  
451 ablation in our own CRPC models (Fig. 1). Despite differences identified in the ULK1  
452 phosphorylation sites, our results agree with the overall concept that CAMKK2-AMPK-  
453 induced ULK1 activation and autophagy provides an important survival mechanism for  
454 prostate cancer cell growth.

455

456 **Fig 8. Working model depicting how AR-CAMKK2-AMPK signaling regulates**  
457 **autophagy by ULK1 phosphorylation and activation in prostate cancer.**

458 AR increases the expression of *CAMKK2* which in turn phosphorylates and activates  
459 AMPK at threonine 172. As a result, AMPK phosphorylates ULK1 at serine 555 which  
460 activates the ULK1 complex and initiates autophagy, supporting prostate cancer growth.

461 This growth and survival mechanism can be blocked at several steps and as such, offers  
462 alternative strategies for targeting autophagy in prostate cancer.

463

464 Interestingly, despite agreement that autophagy promotes prostate cancer progression,  
465 how this process is regulated by AR is still debated(18, 25, 26, 28, 36, 53, 63, 67, 69, 70).  
466 These discrepancies may be attributable to differences in the duration of upstream  
467 signals, reliance on indirect or nonselective modulators of autophagy or treatment  
468 conditions. As we and others have shown, androgens, in an AR-dependent mechanism,  
469 can directly and indirectly increase autophagy through a variety of mechanisms including  
470 elevating intracellular ROS levels and transcription of core autophagy genes(25-27, 63).  
471 As shown here, there is also a clear, direct AR regulation of AMPK-mediated autophagy  
472 through the expression of *CAMKK2*. The mechanism underlying how antiandrogens can,  
473 like androgens, paradoxically also can increase autophagy is less clear. But these  
474 different observations may speak to the potential benefit of targeting downstream effector  
475 processes like autophagy that can be activated under a variety of conditions to drive  
476 disease progression. Our data presented here provides evidence that targeting CAMKK2-  
477 AMPK-ULK1 signaling may be an effective, alternative strategy to block protective  
478 autophagy in advanced prostate cancer.

479

480 Under glucose or amino acid starvation, ULK1 is well characterized to be regulated by  
481 AMPK. AMPK binds to the serine/proline-rich domain and can phosphorylate ULK1 at  
482 multiple sites (S317, S467, S555, T575, S637 and S777) which subsequently change

483 ULK1 conformation and enhance its kinase activity. This, in turn, promotes the formation  
484 of the ULK1 complex (ULK1, ATG13, ATG101, and FIP200)(41, 46). Activated ULK1 can  
485 further phosphorylate downstream VPS34 complex members to induce autophagic  
486 entry(46). In this study, we first demonstrated the S555 site of ULK1 as a downstream  
487 target of AMPK in response to androgen treatment. S555 was increased under androgen  
488 treatment but could not be activated when cells were subjected to *AMPK* siRNA (Fig.  
489 5B&C). When cells were reconstituted with a non-phosphorylatable ULK1 mutant (4SA),  
490 they were defective in autophagy following AMPK activation (Fig. 5D). Although we  
491 cannot exclude contributions from other phosphorylation sites, these findings suggest the  
492 functional importance of ULK1 S555 by AMPK in AR-mediated autophagy induction and  
493 support prior reports that S555 is functionally one of the most important AMPK target sites  
494 on ULK1(47, 51, 52).

495

496 Interestingly, we observed a negative feedback loop between AMPK and ULK1 similar to  
497 what has been described before in HEK293 cells under starvation(60). While non-  
498 phosphorylatable ULK1 mutants impaired autophagy, they significantly increased p-  
499 AMPK (T172) (Fig. 5D). Likewise, when cells were treated with the ULK1 inhibitor SBI-  
500 0206965, a robust enhancement of p-AMPK was detected (Figs. 7B and Supplementary  
501 Fig. S4). It is unclear at this time if this translates to other AMPK-mediated processes  
502 being hyperactivated and therefore influencing prostate cancer cell pathobiology.

503

504 The efficacy of autophagy inhibition in preclinical models of cancer has paved the way for  
505 new clinical trials investigating the efficacy of autophagy inhibition in patients, particularly  
506 in combination with traditional anti-cancer treatments. Chloroquine and its derivative  
507 hydroxychloroquine, as FDA-approved drugs, have been favored and repurposed in  
508 prostate cancer. Previous studies indicated that chloroquine in combination with other  
509 therapeutic agents including anti-androgens, chemotherapy and kinase inhibitors can  
510 induce greater cytotoxicity than single agent treatment alone(15, 67, 69, 71-73). Likewise,  
511 our data indicate anti-cancer effects for chloroquine in combination with androgen  
512 deprivation therapy (Fig. 1). Although a series of clinical trials in prostate cancer have  
513 been started to test the efficacy of chloroquine analogs, thus far, limited clinical efficacy  
514 has been observed. This is believed to be due in large part to an inability to achieve the  
515 drug concentration needed for sustained inhibition of autophagy within tumors prior to the  
516 onset of significant side effects(16). Despite the fact that hydroxychloroquine is safer than  
517 chloroquine, a micromolar concentrations are required to maintain autophagy inhibition in  
518 patients(71). Even so, variable effects on autophagy are still being observed, possibly  
519 due to inconsistencies in cell penetration that are in part dependent on the individual's  
520 tumor microenvironment(15). Thus, long-term and high-dosage treatments will inevitably  
521 reduce the therapeutic window. Given the potential challenges in the use of  
522 lysosomotropic agents, which are not even specific for autophagy, targeting other steps  
523 in autophagy, such as ULK1, may provide alternative solutions.

524

525 ULK1 expression is highly correlated with patient disease-free time, biochemical  
526 recurrence, Gleason score, and metastasis (Fig. 6 &(57, 58)). Currently, three studies



527 have investigated this ULK1 inhibitor and showed selective and potent inhibition on ULK1  
528 activity(59, 74, 75). In agreement with other reports, our data showed that SBI-0206965  
529 inhibited ULK1 activity as evidenced by the reduction of p-VPS34 (S249) (Figs. 7B and  
530 Supplementary Fig. S4). Moreover, SBI-0206965 exhibited its anti-growth activity in both  
531 hormone-sensitive and CRPC cells (Figs. 7C-H). A recent study suggested that SBI-  
532 0206965 is a dual inhibitor of AMPK and ULK1(76). While this would potentially be  
533 beneficial for blocking two important nodes of AR-CAMKK2-AMPK-ULK1 signaling, we  
534 did not observe a consistent decrease of p-ULK1 after SBI-0206965 treatment,  
535 suggesting SBI-0206965 may not function as an AMPK inhibitor in our models. However,  
536 we acknowledge that this interpretation may be convoluted due to the above-described  
537 feedback mechanism between AMPK and ULK1(60). In addition, the efficacy and  
538 pharmacokinetic profile of SBI-0206965 *in vivo* are still largely unknown.

539

540 Given that systemic blocking or genetic ablation of CAMKK2 appears well-tolerated in  
541 mouse models and CAMKK2 has a more restricted expression profile but is elevated in  
542 prostate cancer, we propose targeting CAMKK2 may be a viable alternative.  
543 Unfortunately, the use of STO-609 as used in this study is likely not a clinically viable  
544 option due to its off-target effects on other kinases and pharmacokinetic limitations(43-  
545 45). There are, however, ongoing efforts to develop next-generation CAMKK2  
546 inhibitors(44, 77-79).

547

548 In summary, our results provide a novel mechanism that links AR signaling and protective  
549 autophagy in prostate cancer. Targeting CAMKK2 decreases the AMPK-mediated  
550 phosphorylation of ULK1 at serine 555, which in turn stalls the initiation of autophagy and  
551 impairs prostate cancer cell growth. These findings not only add a mechanistic layer of  
552 complexity to shed light on AR's regulation of autophagy, but also provides new  
553 opportunities for inhibiting autophagy in prostate cancer that we postulate warrant being  
554 tested to determine if they can overcome the existing limitations of chloroquine.

555

## 556 **Materials and methods**

### 557 **Cell culture, plasmids and reagents**

558 LNCaP, 22Rv1 and HEK293T cell lines were obtained from American Type Culture  
559 Collection (Baltimore, MD, USA) (CRL-1740, CRL-2505, CRL-3216). C4-2 cells were  
560 obtained from Dr. Nancy Weigel (Baylor College of Medicine). LNCaP-CAMKK2 and  
561 22Rv1-shCAMKK2 cells have previously been described(8). 22Rv1-fLuc cells were  
562 created by pBABE-fLuc-YFP plasmid (a gift from Dr. Christopher Counter, Duke School  
563 of Medicine) with retroviral transduction strategy(80). Cells were maintained as previously  
564 described(26) and validated by STR profiling (University of Texas MD Anderson Cancer  
565 Center Cell Culture Core). All cells were confirmed to be mycoplasma-free by MycoAlert  
566 Mycoplasma Detection Kit (Lonza, Morristown, NJ USA; Cat #: LT07-118). Cells were  
567 steroid-starved in phenol red-free medium containing 10% charcoal stripped-FBS (5%  
568 CS-FBS for C4-2 cells) for 72 hours before treatment unless otherwise noted. pCW-Cas9  
569 and pLX-sgRNA were gifts from Drs. Eric Lander & David Sabatini (Addgene, Watertown,  
570 MA, USA; plasmids #: 50661, 50662). pcDNA4-VPS34-Flag was a gift from Dr. Qing

571 Zhong (Addgene plasmid #: 24398). pcDNA3.1-hULK1 and 4SA mutant were gifts from  
572 Dr. Mondira Kundu (St. Jude Children's Research Hospital). Enhanced GFP-LC3 and  
573 mCherry-GFP-LC3B constructs have been previously described(81). The synthetic  
574 androgen methyltrienolone (R1881) was purchased from PerkinElmer (Naperville, IL,  
575 USA; Cat #: NLP005005MG). Chloroquine (Cat #: C6628), doxycycline hyclate (Cat #:  
576 D9891), puromycin (Cat #: P8833), BrdU (5-bromo-2-deoxyuridine, Cat #: B5002) and  
577 polybrene (Cat #: TR-1003) were purchased from Sigma-Aldrich (St. Louis, MO, USA).  
578 G418 sulfate was purchased from Gold Biotechnology (St. Louis, MO, USA; Cat #: G-  
579 418-25). Blastidin was purchased from Millipore Sigma (St. Louis, MO, USA; Cat #:  
580 203350).

#### 581 **Xenografts, histology and immunostaining**

582 All animal experiments were approved by and conducted under the Institutional Animal  
583 Care and Use Committee (IACUC) at the University of Texas MD Anderson Cancer  
584 Center and the University of Houston according to NIH and institutional guidelines.  
585 Xenografts were performed on 6-8 weeks male NSG mice obtained from either The  
586 Jackson Laboratory (Bar Harbor, ME, USA; Cat #: 005557; Fig. 1&3E) or The University  
587 of Texas MD Anderson Cancer Center Experimental Radiation Oncology Breeding Core  
588 (Fig. 3A). Castrations were conducted one week before injections. One million cells in  
589 200  $\mu$ l DPBS: Matrigel® 1:1 vol/vol (Corning, Corning, NY, USA; Cat #356231) were  
590 injected subcutaneously into flanks. Tumor size was measured by calipers until tumor  
591 lengths in the control group reached 1.5 cm or signs of morbidity were observed (ex.  
592 reduced body weight or hunched back). Tumor volume was calculated by the formula:  
593 length x width<sup>2</sup>/2.

594 For 22Rv1-shCAMKK2 xenografts, mice were randomized into normal/control or  
595 doxycycline-containing (625 mg/kg, Envigo, IN, USA) diet groups. Then, shRNA  
596 expression with surrogate red fluorescent protein (RFP) was tracked by fluorescence  
597 (IVIS Spectrum *In Vivo* Imaging Station, PerkinElmer). For chloroquine xenograft  
598 experiments, mice were randomly grouped into vehicle control or chloroquine IP  
599 treatment when the tumor volume reached 100 mm<sup>3</sup>. One hour before tissue/tumor  
600 collection/sacrifice, mice were injected with 100 mg/kg BrdU. Half of the tumor sample  
601 was snap frozen while the other half was immediately fixed in 4% PFA overnight at 4°C.  
602 For staining, samples were dehydrated and embedded in paraffin. Paraffin slides were  
603 then rehydrated and further processed with antigen retrieval in citrate buffer (DAKO,  
604 Santa Clara, CA, USA; Cat #: S169984-2). Peroxidase blocking was performed in 1%  
605 H<sub>2</sub>O<sub>2</sub> plus 10% methanol solution. Proliferative cells were detected by BrdU staining. For  
606 this, slides were blocked with goat serum (DAKO; Cat #: X090710-8) and incubated  
607 overnight with anti-BrdU antibody (Calbiochem: Part of Millipore Sigma; Cat #: NA61).  
608 After washing with PBST (PBS with 0.02% Tween 20), secondary antibodies (Mouse-on-  
609 Mouse HRP Polymer, Biocare Medical, CA, USA, Cat#: MM620) were incubated for 30  
610 minutes. Sections were developed by DAB (Vectorlabs, Burlingame, CA, USA; Cat #: SK-  
611 4100). Apoptotic cells were detected by TUNEL staining using the *In Situ* Cell Death  
612 Detection Kit, Fluorescein (Roche, Madison, WI, USA; Cat #: 11684795910) following the  
613 manufacturer's instructions. Hematoxylin and eosin staining was performed by the  
614 University of Texas MD Anderson Cancer Center Department of Veterinary Medicine and  
615 Surgery Research Animal Support Facility. Microscopy was done with an Olympus BX51

616 microscope and cellSens imaging software (Olympus, Center Valley, PA, USA). Analysis  
617 was done on 3-6 acquired fields per section and data were averaged.

### 618 **Plasmid and small interfering RNA (siRNA) transfections**

619 All transfections were conducted as previously described(8, 81). In brief, plasmids were  
620 transfected using Lipofectamine 2000 transfection reagent (Thermo Fisher Scientific,  
621 Waltham, PA, USA) according to the manufacturer's instructions. The siRNAs were  
622 purchased from Thermo Fisher Scientific and transfected using DharmaFECT 1  
623 transfection reagent. Sequences of the shRNAs and siRNAs used in this study are listed  
624 in Supplementary Table 1.

### 625 **Generation of CRISPR/Cas9 *CAMKK2* knockout cells.**

626 pCW-Cas9 was co-transfected with lentiviral packaging plasmids into actively growing  
627 HEK293T cells using Lipofectamine 2000 transfection reagent. After 48 hours, medium  
628 containing virus was collected, filtered and added to the target cells with 8 µg/ml  
629 polybrene. After 48 hours, fresh medium with 1 µg/ml puromycin was used to select  
630 doxycycline-inducible Cas9 expressed target cells. The gRNAs targeting *CAMKK2* were  
631 designed by <http://crispor.tefor.net/>(82) and synthesized by Sigma (listed in  
632 Supplementary Table 1). The sgRNA oligos were cloned into pLX-sgRNA. pLX-*CAMKK2*  
633 sgRNAs were transfected into Cas9-inducible expressing cells by the same lentiviral  
634 transduction strategy before selection with 10 µg/ml blasticidin. Cells expressing inducible  
635 Cas9 and sgRNA were first treated with doxycycline for 7 days. This method limited the  
636 Cas9 activation window and therefore greater potential for off-target CRISPR effects.  
637 After, single clones were isolated and screened to establish *CAMKK2* knockout cells.  
638 Parental Cas9-inducible cells were used as control. Each clone was validated by

639 sequencing and western blot.

#### 640 **Western blot analysis**

641 Western blot analysis was performed as previously described(8, 9, 26, 81). Briefly, cells  
642 were harvested in RIPA lysis buffer (50 mM Tris HCl pH 8, 150 mM NaCl, 1% NP-40,  
643 0.5% sodium deoxycholate, 0.1% SDS) supplemented with Complete Protease Inhibitor  
644 Cocktail (Sigma, Cat #: 11697498001) and PhosSTOP phosphatase inhibitor (Roche, Cat  
645 #:4906845001). Primary antibodies were purchased from the following sources: Cell  
646 Signaling Technology (Danvers, MA, USA): ULK1 (Cat #: 4773), p-ULK1(S555) (Cat #:  
647 5869), LC3B (Cat #: 2775), p-AMPK(T172) (Cat #: 2535), p-VPS34(S249) (Cat #: 13857);  
648 Sigma: CAMKK2 (Cat #: HPA017389), GAPDH (Cat #: G8795), FLAG (Cat #: F1804).

#### 649 **Immunofluorescence microscopy**

650 GFP-LC3/mCherry-GFP-LC3 fusion constructs were expressed in cells as previously  
651 described(26, 81). Following treatments, cells were fixed with 4% PFA for 15 min at RT  
652 and DAPI was used as a counterstain. Images were captured using the Olympus BX51  
653 fluorescence microscope and cellSense imaging software. Samples were analyzed by  
654 Image J where LC3 puncta per cell were counted for 50 cells per cell line and averaged.

#### 655 **Transmission electron microscopy (TEM)**

656 Cells were plated at 100,000 cells/well in 6-well plates and treated as indicated in  
657 figures/figure legends. Samples were fixed with a Karnovsky's fixative solution (3%  
658 glutaraldehyde plus 2% paraformaldehyde in 0.1 M cacodylate buffer, pH 7.3) at 4 °C.  
659 Samples were further processed by the University of Texas MD Anderson Cancer Center  
660 High Resolution Electron Microscopy Core Facility.

661 **Proliferation assays**

662 Proliferation assays were carried out as previously described by measuring the cellular  
663 double-stranded DNA content using a fluorescent DNA stain(81).

664 **Clonogenic assays**

665 Cells were plated at 5000 (LNCaP) or 1000 (C4-2, 22Rv1) cells/well in 6-well plates.  
666 Colonies were formed for 3-4 weeks. Media and treatments were refreshed every week.  
667 Cells were fixed with acetic acid/methanol 1:7 (vol/vol) and then stained with 0.5% crystal  
668 violet. The number of visible colonies were counted. The data were representative of  
669 three independent experiments with similar results.

670 **Statistical analysis**

671 Statistical analyses were performed using Microsoft Excel 2013 (Redmond, WA, USA)  
672 and GraphPad Prism 8 (San Diego, CA, USA). Bioinformatic analyses of the correlation  
673 of ULK1 gene expression with patient prognosis were generated from cBioPortal(83, 84).  
674 One-way or two-way ANOVAs, Student *t*-tests were used to determine the significance  
675 among groups where appropriate as indicated in the figures or figure legends. Log-rank  
676 test was used to determine the significance of Kaplan-Meier curves. Grouped data are  
677 presented as mean  $\pm$  SEM unless otherwise noted. *P* values are indicated in figures or  
678 figure legends.

679

680 **Acknowledgments**

681 We thank members of the Frigo laboratory for helpful discussions and editorial assistance  
682 during the preparation of the manuscript. We also thank Dr. Mondira Kundu (St. Jude  
683 Children's Hospital) for the gift of the ULK expression constructs, Dr. Christopher Counter  
684 (Duke School of Medicine) for the gift of pBABE-fLuc-YFP construct, Dr. Nancy Weigel  
685 (Baylor College of Medicine) for the C4-2 cell line, Kenneth Dunner, Jr. in the High  
686 Resolution Electron Microscopy Core Facility at MD Anderson Cancer Center for his help  
687 in acquiring the TEM images, and Dr. Jeff Spencer (University of Houston) for the help  
688 with sgRNA design. This work was supported by grants from the National Institutes of  
689 Health (NIH R01CA184208 to D.E.F.), American Cancer Society (RSG-16-084-01-TBE  
690 to D.E.F.), an Institutional Research Grant (to D.E.F.), startup grants from the University  
691 of Texas MD Anderson Cancer Center (to D.E.F.) and generous philanthropic  
692 contributions to The University of Texas MD Anderson Moon Shots Program (to D.E.F.).  
693 This work was also supported by an Antje Wuelfrath Gee and Harry Gee, Jr. Family  
694 Legacy Scholarship (to C.L.) and MD Anderson Odyssey fellow supported by the CFP  
695 foundation (to A.B.B). Electron microscopy was performed by the CCSG-funded  
696 University of Texas MD Anderson Cancer Center High Resolution Electron Microscopy  
697 Facility while histology was performed in conjunction with the CCSG-funded University of  
698 Texas MD Anderson Cancer Center Research Histology Core Laboratory, NIH grant  
699 P30CA0166772.

700

701



702 **REFERENCES**

- 703 1. Society AC. Cancer Facts & Figures 2020. Atlanta: American Cancer Society.  
704 2020.
- 705 2. Chaturvedi AP, Dehm SM. Androgen Receptor Dependence. *Adv Exp Med Biol.*  
706 2019;1210:333-50.
- 707 3. Frigo DE, Howe MK, Wittmann BM, Brunner AM, Cushman I, Wang Q, et al. CaM  
708 kinase kinase beta-mediated activation of the growth regulatory kinase AMPK is  
709 required for androgen-dependent migration of prostate cancer cells. *Cancer Res.*  
710 2011;71(2):528-37.
- 711 4. Massie CE, Lynch A, Ramos-Montoya A, Boren J, Stark R, Fazli L, et al. The  
712 androgen receptor fuels prostate cancer by regulating central metabolism and  
713 biosynthesis. *EMBO J.* 2011;30(13):2719-33.
- 714 5. Karacosta LG, Foster BA, Azabdaftari G, Feliciano DM, Edelman AM. A regulatory  
715 feedback loop between Ca<sup>2+</sup>/calmodulin-dependent protein kinase kinase 2  
716 (CaMKK2) and the androgen receptor in prostate cancer progression. *J Biol Chem.*  
717 2012;287(29):24832-43.
- 718 6. Sharma NL, Massie CE, Ramos-Montoya A, Zecchini V, Scott HE, Lamb AD, et al.  
719 The androgen receptor induces a distinct transcriptional program in castration-  
720 resistant prostate cancer in man. *Cancer Cell.* 2013;23(1):35-47.
- 721 7. Penfold L, Woods A, Muckett P, Nikitin AY, Kent TR, Zhang S, et al. CAMKK2  
722 Promotes Prostate Cancer Independently of AMPK via Increased Lipogenesis.  
723 *Cancer Res.* 2018;78(24):6747-61.

- 724 8. White MA, Tsouko E, Lin C, Rajapakshe K, Spencer JM, Wilkenfeld SR, et al.  
725 GLUT12 promotes prostate cancer cell growth and is regulated by androgens and  
726 CaMKK2 signaling. *Endocr Relat Cancer*. 2018;25(4):453-69.
- 727 9. Tennakoon JB, Shi Y, Han JJ, Tsouko E, White MA, Burns AR, et al. Androgens  
728 regulate prostate cancer cell growth via an AMPK-PGC-1alpha-mediated  
729 metabolic switch. *Oncogene*. 2014;33(45):5251-61.
- 730 10. Hardie DG. AMPK and autophagy get connected. *EMBO J*. 2011;30(4):634-5.
- 731 11. Klionsky DJ, Abdelmohsen K, Abe A, Abedin MJ, Abeliovich H, Acevedo Arozena  
732 A, et al. Guidelines for the use and interpretation of assays for monitoring  
733 autophagy (3rd edition). *Autophagy*. 2016;12(1):1-222.
- 734 12. Yang Y, Klionsky DJ. Autophagy and disease: unanswered questions. *Cell Death*  
735 *Differ*. 2020;27(3):858-71.
- 736 13. Galluzzi L, Pietrocola F, Bravo-San Pedro JM, Amaravadi RK, Baehrecke EH,  
737 Cecconi F, et al. Autophagy in malignant transformation and cancer progression.  
738 *EMBO J*. 2015;34(7):856-80.
- 739 14. Goldsmith J, Levine B, Debnath J. Autophagy and cancer metabolism. *Methods*  
740 *Enzymol*. 2014;542:25-57.
- 741 15. Amaravadi RK, Kimmelman AC, Debnath J. Targeting Autophagy in Cancer:  
742 Recent Advances and Future Directions. *Cancer Discov*. 2019;9(9):1167-81.
- 743 16. Levy JMM, Towers CG, Thorburn A. Targeting autophagy in cancer. *Nat Rev*  
744 *Cancer*. 2017;17(9):528-42.
- 745 17. Hippert MM, O'Toole PS, Thorburn A. Autophagy in cancer: good, bad, or both?  
746 *Cancer Res*. 2006;66(19):9349-51.

- 747 18. Fabio Gabrielle CM, Sergio Comincini. Prostate cancer cells at a therapeutic  
748 gunpoint of the autophagy process. *Journal of Cancer Metastasis and Treatment*.  
749 2018;4(17).
- 750 19. Mizushima N, Levine B, Cuervo AM, Klionsky DJ. Autophagy fights disease  
751 through cellular self-digestion. *Nature*. 2008;451(7182):1069-75.
- 752 20. Green DR, Galluzzi L, Kroemer G. Mitochondria and the autophagy-inflammation-  
753 cell death axis in organismal aging. *Science*. 2011;333(6046):1109-12.
- 754 21. Karsli-Uzunbas G, Guo JY, Price S, Teng X, Laddha SV, Khor S, et al. Autophagy  
755 is required for glucose homeostasis and lung tumor maintenance. *Cancer Discov*.  
756 2014;4(8):914-27.
- 757 22. Levy JM, Thompson JC, Griesinger AM, Amani V, Donson AM, Birks DK, et al.  
758 Autophagy inhibition improves chemosensitivity in BRAF(V600E) brain tumors.  
759 *Cancer Discov*. 2014;4(7):773-80.
- 760 23. Tan Q, Wang M, Yu M, Zhang J, Bristow RG, Hill RP, et al. Role of Autophagy as  
761 a Survival Mechanism for Hypoxic Cells in Tumors. *Neoplasia*. 2016;18(6):347-55.
- 762 24. Daskalaki I, Gkikas I, Tavernarakis N. Hypoxia and Selective Autophagy in Cancer  
763 Development and Therapy. *Front Cell Dev Biol*. 2018;6:104.
- 764 25. Shi Y, Han JJ, Tennakoon JB, Mehta FF, Merchant FA, Burns AR, et al. Androgens  
765 promote prostate cancer cell growth through induction of autophagy. *Mol*  
766 *Endocrinol*. 2013;27(2):280-95.
- 767 26. Blessing AM, Rajapakshe K, Reddy Bollu L, Shi Y, White MA, Pham AH, et al.  
768 Transcriptional regulation of core autophagy and lysosomal genes by the androgen  
769 receptor promotes prostate cancer progression. *Autophagy*. 2017;13(3):506-21.

- 770 27. Santanam U, Banach-Petrosky W, Abate-Shen C, Shen MM, White E, DiPaola RS.  
771 Atg7 cooperates with Pten loss to drive prostate cancer tumor growth. *Genes Dev.*  
772 2016;30(4):399-407.
- 773 28. Nguyen HG, Yang JC, Kung HJ, Shi XB, Tilki D, Lara PN, Jr., et al. Targeting  
774 autophagy overcomes Enzalutamide resistance in castration-resistant prostate  
775 cancer cells and improves therapeutic response in a xenograft model. *Oncogene.*  
776 2014;33(36):4521-30.
- 777 29. Wang L, Wang J, Xiong H, Wu F, Lan T, Zhang Y, et al. Co-targeting hexokinase  
778 2-mediated Warburg effect and ULK1-dependent autophagy suppresses tumor  
779 growth of PTEN- and TP53-deficiency-driven castration-resistant prostate cancer.  
780 *EBioMedicine.* 2016;7:50-61.
- 781 30. Bennett HL, Stockley J, Fleming JT, Mandal R, O'Prey J, Ryan KM, et al. Does  
782 androgen-ablation therapy (AAT) associated autophagy have a pro-survival effect  
783 in LNCaP human prostate cancer cells? *BJU Int.* 2013;111(4):672-82.
- 784 31. Kaini RR, Hu CA. Synergistic killing effect of chloroquine and androgen deprivation  
785 in LNCaP cells. *Biochem Biophys Res Commun.* 2012;425(2):150-6.
- 786 32. Lamoureux F, Thomas C, Crafter C, Kumano M, Zhang F, Davies BR, et al.  
787 Blocked autophagy using lysosomotropic agents sensitizes resistant prostate  
788 tumor cells to the novel Akt inhibitor AZD5363. *Clin Cancer Res.* 2013;19(4):833-  
789 44.
- 790 33. Amaravadi RK, Lippincott-Schwartz J, Yin XM, Weiss WA, Takebe N, Timmer W,  
791 et al. Principles and current strategies for targeting autophagy for cancer  
792 treatment. *Clin Cancer Res.* 2011;17(4):654-66.

- 793 34. Mauthe M, Orhon I, Rocchi C, Zhou X, Luhr M, Hijlkema KJ, et al. Chloroquine  
794 inhibits autophagic flux by decreasing autophagosome-lysosome fusion.  
795 *Autophagy*. 2018;14(8):1435-55.
- 796 35. Solomon VR, Lee H. Chloroquine and its analogs: a new promise of an old drug  
797 for effective and safe cancer therapies. *Eur J Pharmacol*. 2009;625(1-3):220-33.
- 798 36. Alers S, Loffler AS, Wesselborg S, Stork B. Role of AMPK-mTOR-Ulk1/2 in the  
799 regulation of autophagy: cross talk, shortcuts, and feedbacks. *Mol Cell Biol*.  
800 2012;32(1):2-11.
- 801 37. Mihaylova MM, Shaw RJ. The AMPK signalling pathway coordinates cell growth,  
802 autophagy and metabolism. *Nat Cell Biol*. 2011;13(9):1016-23.
- 803 38. Kim J, Guan KL. Regulation of the autophagy initiating kinase ULK1 by nutrients:  
804 roles of mTORC1 and AMPK. *Cell Cycle*. 2011;10(9):1337-8.
- 805 39. Marcelo KL, Means AR, York B. The Ca(2+)/Calmodulin/CaMKK2 Axis: Nature's  
806 Metabolic CaMshaft. *Trends Endocrinol Metab*. 2016;27(10):706-18.
- 807 40. Racioppi L, Means AR. Calcium/calmodulin-dependent protein kinase kinase 2:  
808 roles in signaling and pathophysiology. *J Biol Chem*. 2012;287(38):31658-65.
- 809 41. Egan D, Kim J, Shaw RJ, Guan KL. The autophagy initiating kinase ULK1 is  
810 regulated via opposing phosphorylation by AMPK and mTOR. *Autophagy*.  
811 2011;7(6):643-4.
- 812 42. Dadwal UC, Chang ES, Sankar U. Androgen Receptor-CaMKK2 Axis in Prostate  
813 Cancer and Bone Microenvironment. *Front Endocrinol (Lausanne)*. 2018;9:335.
- 814 43. Bain J, Plater L, Elliott M, Shpiro N, Hastie CJ, McLauchlan H, et al. The selectivity  
815 of protein kinase inhibitors: a further update. *Biochem J*. 2007;408(3):297-315.

- 816 44. O'Byrne SN, Scott JW, Pilotte JR, Santiago ADS, Langendorf CG, Oakhill JS, et  
817 al. In Depth Analysis of Kinase Cross Screening Data to Identify CAMKK2  
818 Inhibitory Scaffolds. *Molecules*. 2020;25(2).
- 819 45. Kukimoto-Niino M, Yoshikawa S, Takagi T, Ohsawa N, Tomabechei Y, Terada T, et  
820 al. Crystal structure of the Ca<sup>2+</sup>(+)/calmodulin-dependent protein kinase kinase in  
821 complex with the inhibitor STO-609. *J Biol Chem*. 2011;286(25):22570-9.
- 822 46. Zachari M, Ganley IG. The mammalian ULK1 complex and autophagy initiation.  
823 *Essays Biochem*. 2017;61(6):585-96.
- 824 47. Egan DF, Shackelford DB, Mihaylova MM, Gelino S, Kohnz RA, Mair W, et al.  
825 Phosphorylation of ULK1 (hATG1) by AMP-activated protein kinase connects  
826 energy sensing to mitophagy. *Science*. 2011;331(6016):456-61.
- 827 48. Kim J, Kundu M, Viollet B, Guan KL. AMPK and mTOR regulate autophagy through  
828 direct phosphorylation of Ulk1. *Nat Cell Biol*. 2011;13(2):132-41.
- 829 49. Lee JW, Park S, Takahashi Y, Wang HG. The association of AMPK with ULK1  
830 regulates autophagy. *PLoS One*. 2010;5(11):e15394.
- 831 50. Bach M, Larance M, James DE, Ramm G. The serine/threonine kinase ULK1 is a  
832 target of multiple phosphorylation events. *Biochem J*. 2011;440(2):283-91.
- 833 51. Tian W, Li W, Chen Y, Yan Z, Huang X, Zhuang H, et al. Phosphorylation of ULK1  
834 by AMPK regulates translocation of ULK1 to mitochondria and mitophagy. *FEBS  
835 Lett*. 2015;589(15):1847-54.
- 836 52. Laker RC, Drake JC, Wilson RJ, Lira VA, Lewellen BM, Ryall KA, et al. Ampk  
837 phosphorylation of Ulk1 is required for targeting of mitochondria to lysosomes in  
838 exercise-induced mitophagy. *Nat Commun*. 2017;8(1):548.

- 839 53. Khan AS, Frigo DE. A spatiotemporal hypothesis for the regulation, role, and  
840 targeting of AMPK in prostate cancer. *Nat Rev Urol.* 2017;14(3):164-80.
- 841 54. Berglund L, Bjorling E, Oksvold P, Fagerberg L, Asplund A, Szigartyo CA, et al. A  
842 gene-centric Human Protein Atlas for expression profiles based on antibodies. *Mol*  
843 *Cell Proteomics.* 2008;7(10):2019-27.
- 844 55. Hoadley KA, Yau C, Hinoue T, Wolf DM, Lazar AJ, Drill E, et al. Cell-of-Origin  
845 Patterns Dominate the Molecular Classification of 10,000 Tumors from 33 Types  
846 of Cancer. *Cell.* 2018;173(2):291-304 e6.
- 847 56. Taylor BS, Schultz N, Hieronymus H, Gopalan A, Xiao Y, Carver BS, et al.  
848 Integrative genomic profiling of human prostate cancer. *Cancer Cell.*  
849 2010;18(1):11-22.
- 850 57. Zhang HY, Ma YD, Zhang Y, Cui J, Wang ZM. Elevated levels of autophagy-  
851 related marker ULK1 and mitochondrion-associated autophagy inhibitor LRPPRC  
852 are associated with biochemical progression and overall survival after androgen  
853 deprivation therapy in patients with metastatic prostate cancer. *J Clin Pathol.*  
854 2017;70(5):383-9.
- 855 58. Liu B, Miyake H, Nishikawa M, Tei H, Fujisawa M. Expression Profile of Autophagy-  
856 related Markers in Localized Prostate Cancer: Correlation With Biochemical  
857 Recurrence After Radical Prostatectomy. *Urology.* 2015;85(6):1424-30.
- 858 59. Egan DF, Chun MG, Vamos M, Zou H, Rong J, Miller CJ, et al. Small Molecule  
859 Inhibition of the Autophagy Kinase ULK1 and Identification of ULK1 Substrates.  
860 *Mol Cell.* 2015;59(2):285-97.

- 861 60. Loffler AS, Alers S, Dieterle AM, Keppeler H, Franz-Wachtel M, Kundu M, et al.  
862 Ulk1-mediated phosphorylation of AMPK constitutes a negative regulatory  
863 feedback loop. *Autophagy*. 2011;7(7):696-706.
- 864 61. White E, DiPaola RS. The double-edged sword of autophagy modulation in cancer.  
865 *Clin Cancer Res*. 2009;15(17):5308-16.
- 866 62. Mathew R, White E. Autophagy, stress, and cancer metabolism: what doesn't kill  
867 you makes you stronger. *Cold Spring Harb Symp Quant Biol*. 2011;76:389-96.
- 868 63. Chhipa RR, Wu Y, Ip C. AMPK-mediated autophagy is a survival mechanism in  
869 androgen-dependent prostate cancer cells subjected to androgen deprivation and  
870 hypoxia. *Cell Signal*. 2011;23(9):1466-72.
- 871 64. White E. Deconvoluting the context-dependent role for autophagy in cancer. *Nat*  
872 *Rev Cancer*. 2012;12(6):401-10.
- 873 65. Niture S, Ramalinga M, Kedir H, Patacsil D, Niture SS, Li J, et al. TNFAIP8  
874 promotes prostate cancer cell survival by inducing autophagy. *Oncotarget*.  
875 2018;9(42):26884-99.
- 876 66. Sha J, Han Q, Chi C, Zhu Y, Pan J, Dong B, et al. Upregulated KDM4B promotes  
877 prostate cancer cell proliferation by activating autophagy. *J Cell Physiol*.  
878 2020;235(3):2129-38.
- 879 67. Mortezaei A, Salemi S, Kranzbuhler B, Gross O, Sulser T, Simon HU, et al.  
880 Inhibition of autophagy significantly increases the antitumor effect of Abiraterone  
881 in prostate cancer. *World J Urol*. 2019;37(2):351-8.



- 882 68. Zhao F, Huang W, Zhang Z, Mao L, Han Y, Yan J, et al. Triptolide induces  
883 protective autophagy through activation of the CaMKKbeta-AMPK signaling  
884 pathway in prostate cancer cells. *Oncotarget*. 2016;7(5):5366-82.
- 885 69. Kranzbuhler B, Salemi S, Mortezaei A, Sulser T, Eberli D. Combined N-terminal  
886 androgen receptor and autophagy inhibition increases the antitumor effect in  
887 enzalutamide sensitive and enzalutamide resistant prostate cancer cells. *Prostate*.  
888 2019;79(2):206-14.
- 889 70. Munkley J, Rajan P, Lafferty NP, Dalglish C, Jackson RM, Robson CN, et al. A  
890 novel androgen-regulated isoform of the TSC2 tumour suppressor gene increases  
891 cell proliferation. *Oncotarget*. 2014;5(1):131-9.
- 892 71. Solitro AR, MacKeigan JP. Leaving the lysosome behind: novel developments in  
893 autophagy inhibition. *Future Med Chem*. 2016;8(1):73-86.
- 894 72. Verbaanderd C, Maes H, Schaaf MB, Sukhatme VP, Pantziarka P, Sukhatme V,  
895 et al. Repurposing Drugs in Oncology (ReDO)-chloroquine and  
896 hydroxychloroquine as anti-cancer agents. *Ecancermedicalscience*. 2017;11:781.
- 897 73. Zhang Y, Luo P, Leng P. Effect of Autophagy Inhibitor Hydroxychloroquine on  
898 Chemosensitivity of Castration-resistant Prostate Cancer. *Sichuan Da Xue Xue*  
899 *Bao Yi Xue Ban*. 2019;50(3):323-7.
- 900 74. Martin KR, Celano SL, Solitro AR, Gunaydin H, Scott M, O'Hagan RC, et al. A  
901 Potent and Selective ULK1 Inhibitor Suppresses Autophagy and Sensitizes  
902 Cancer Cells to Nutrient Stress. *iScience*. 2018;8:74-84.

- 903 75. Petherick KJ, Conway OJ, Mpamhanga C, Osborne SA, Kamal A, Saxty B, et al.  
904 Pharmacological inhibition of ULK1 kinase blocks mammalian target of rapamycin  
905 (mTOR)-dependent autophagy. *J Biol Chem.* 2015;290(18):11376-83.
- 906 76. Dite TA, Langendorf CG, Hoque A, Galic S, Rebello RJ, Ovens AJ, et al. AMP-  
907 activated protein kinase selectively inhibited by the type II inhibitor SBI-0206965.  
908 *J Biol Chem.* 2018;293(23):8874-85.
- 909 77. Price DJ, Drewry DH, Schaller LT, Thompson BD, Reid PR, Maloney PR, et al. An  
910 orally available, brain-penetrant CAMKK2 inhibitor reduces food intake in rodent  
911 model. *Bioorg Med Chem Lett.* 2018;28(10):1958-63.
- 912 78. Asquith CRM, Godoi PH, Counago RM, Laitinen T, Scott JW, Langendorf CG, et  
913 al. 1,2,6-Thiadiazinones as Novel Narrow Spectrum Calcium/Calmodulin-  
914 Dependent Protein Kinase Kinase 2 (CaMKK2) Inhibitors. *Molecules.* 2018;23(5).
- 915 79. Profeta GS, Dos Reis CV, Santiago ADS, Godoi PHC, Fala AM, Wells CI, et al.  
916 Binding and structural analyses of potent inhibitors of the human  
917 Ca(2+)/calmodulin dependent protein kinase kinase 2 (CAMKK2) identified from a  
918 collection of commercially-available kinase inhibitors. *Sci Rep.* 2019;9(1):16452.
- 919 80. Blessing AM, Ganesan S, Rajapakshe K, Ying Sung Y, Reddy Bollu L, Shi Y, et al.  
920 Identification of a Novel Coregulator, SH3YL1, That Interacts With the Androgen  
921 Receptor N-Terminus. *Mol Endocrinol.* 2015;29(10):1426-39.
- 922 81. Asa'ad FA, Rahman G, Al Mahmoud N, Al Shamas E, Al Khuwaileidi A.  
923 Periodontal disease awareness among pregnant women in the central and eastern  
924 regions of Saudi Arabia. *J Investig Clin Dent.* 2015;6(1):8-15.

- 925 82. Haeussler M, Schonig K, Eckert H, Eschstruth A, Mianne J, Renaud JB, et al.  
926 Evaluation of off-target and on-target scoring algorithms and integration into the  
927 guide RNA selection tool CRISPOR. *Genome Biol.* 2016;17(1):148.
- 928 83. Cerami E, Gao J, Dogrusoz U, Gross BE, Sumer SO, Aksoy BA, et al. The cBio  
929 cancer genomics portal: an open platform for exploring multidimensional cancer  
930 genomics data. *Cancer Discov.* 2012;2(5):401-4.
- 931 84. Gao J, Aksoy BA, Dogrusoz U, Dresdner G, Gross B, Sumer SO, et al. Integrative  
932 analysis of complex cancer genomics and clinical profiles using the cBioPortal. *Sci*  
933 *Signal.* 2013;6(269):pl1.
- 934

# Figure 1

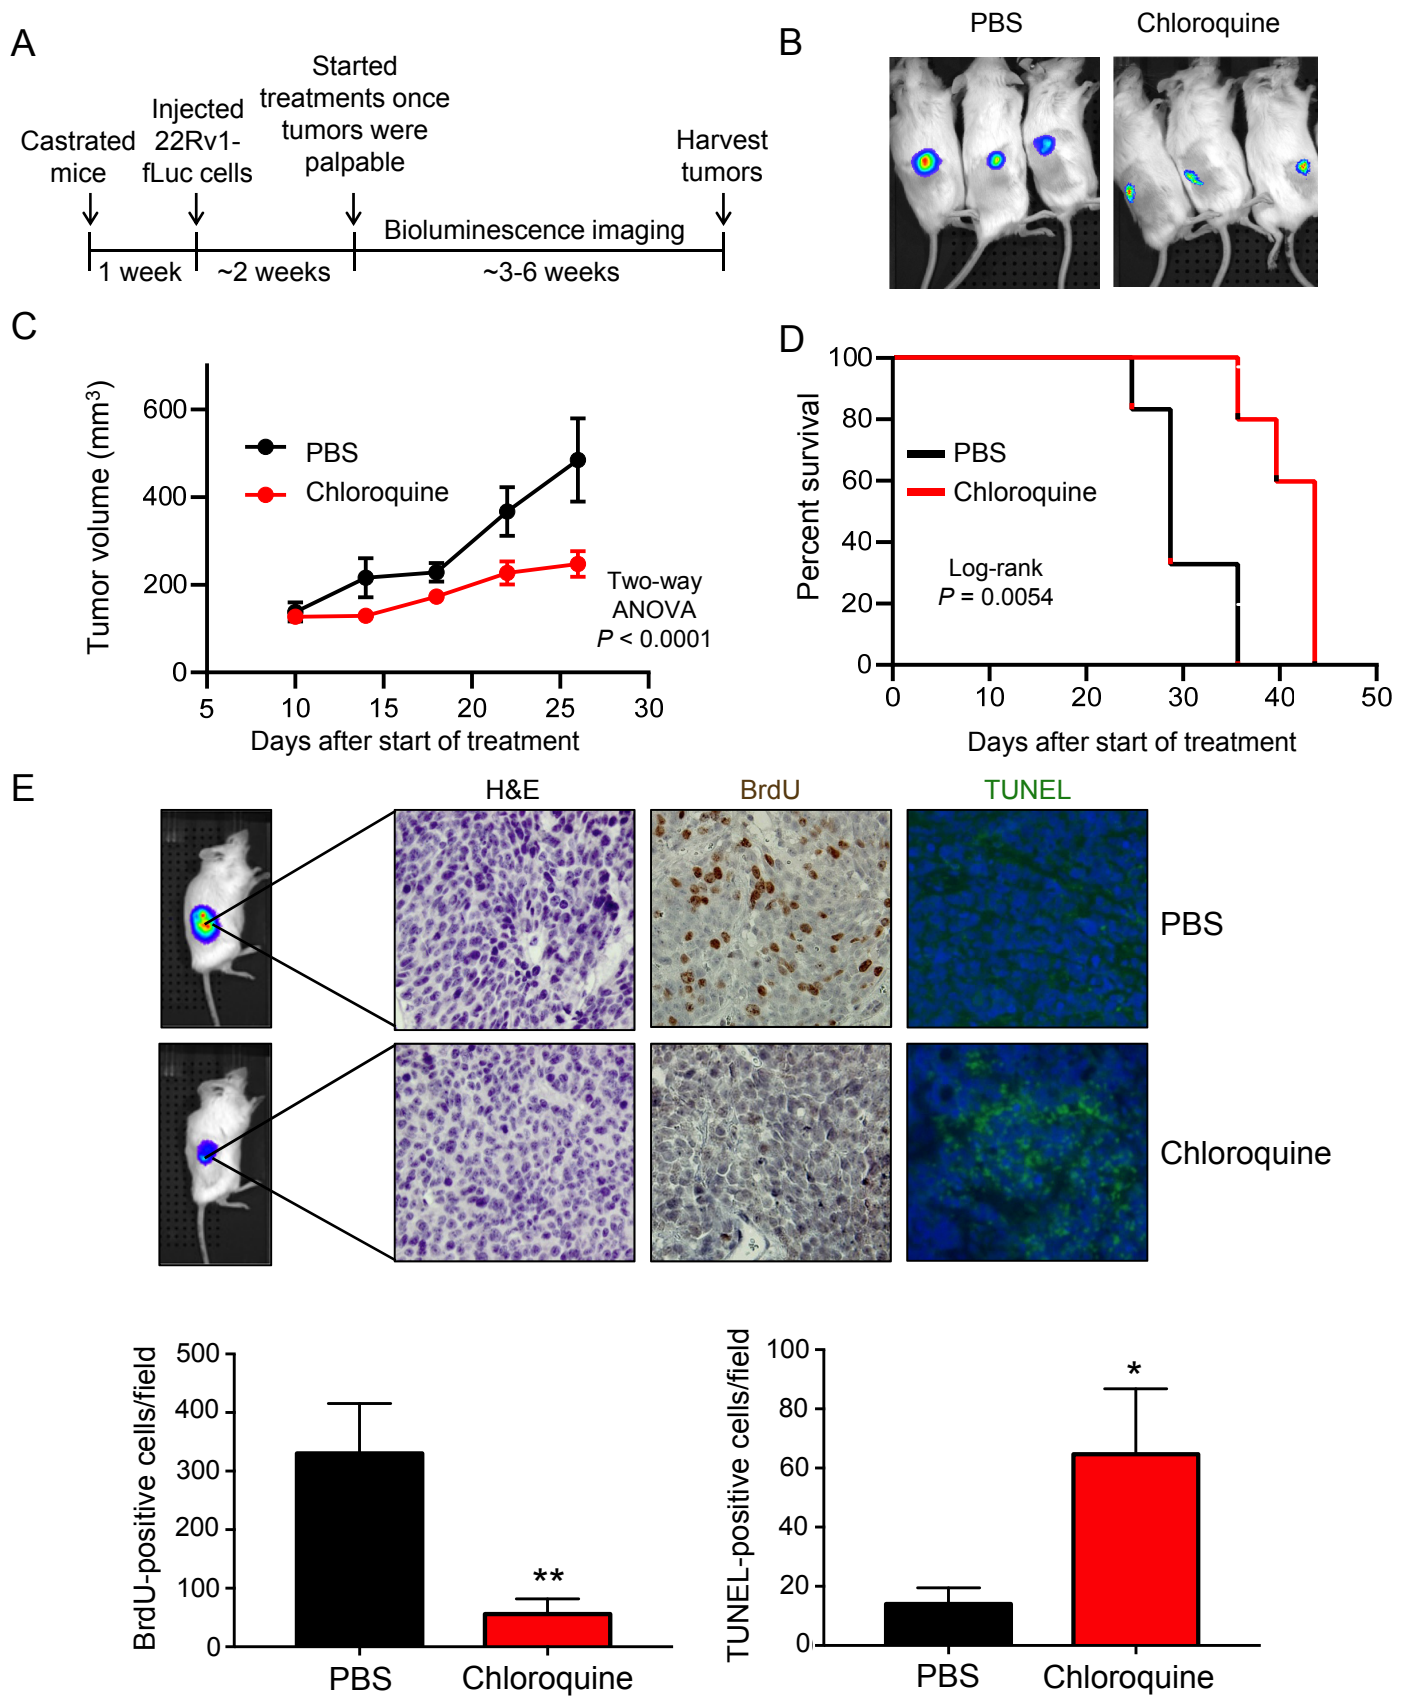

# Figure 2

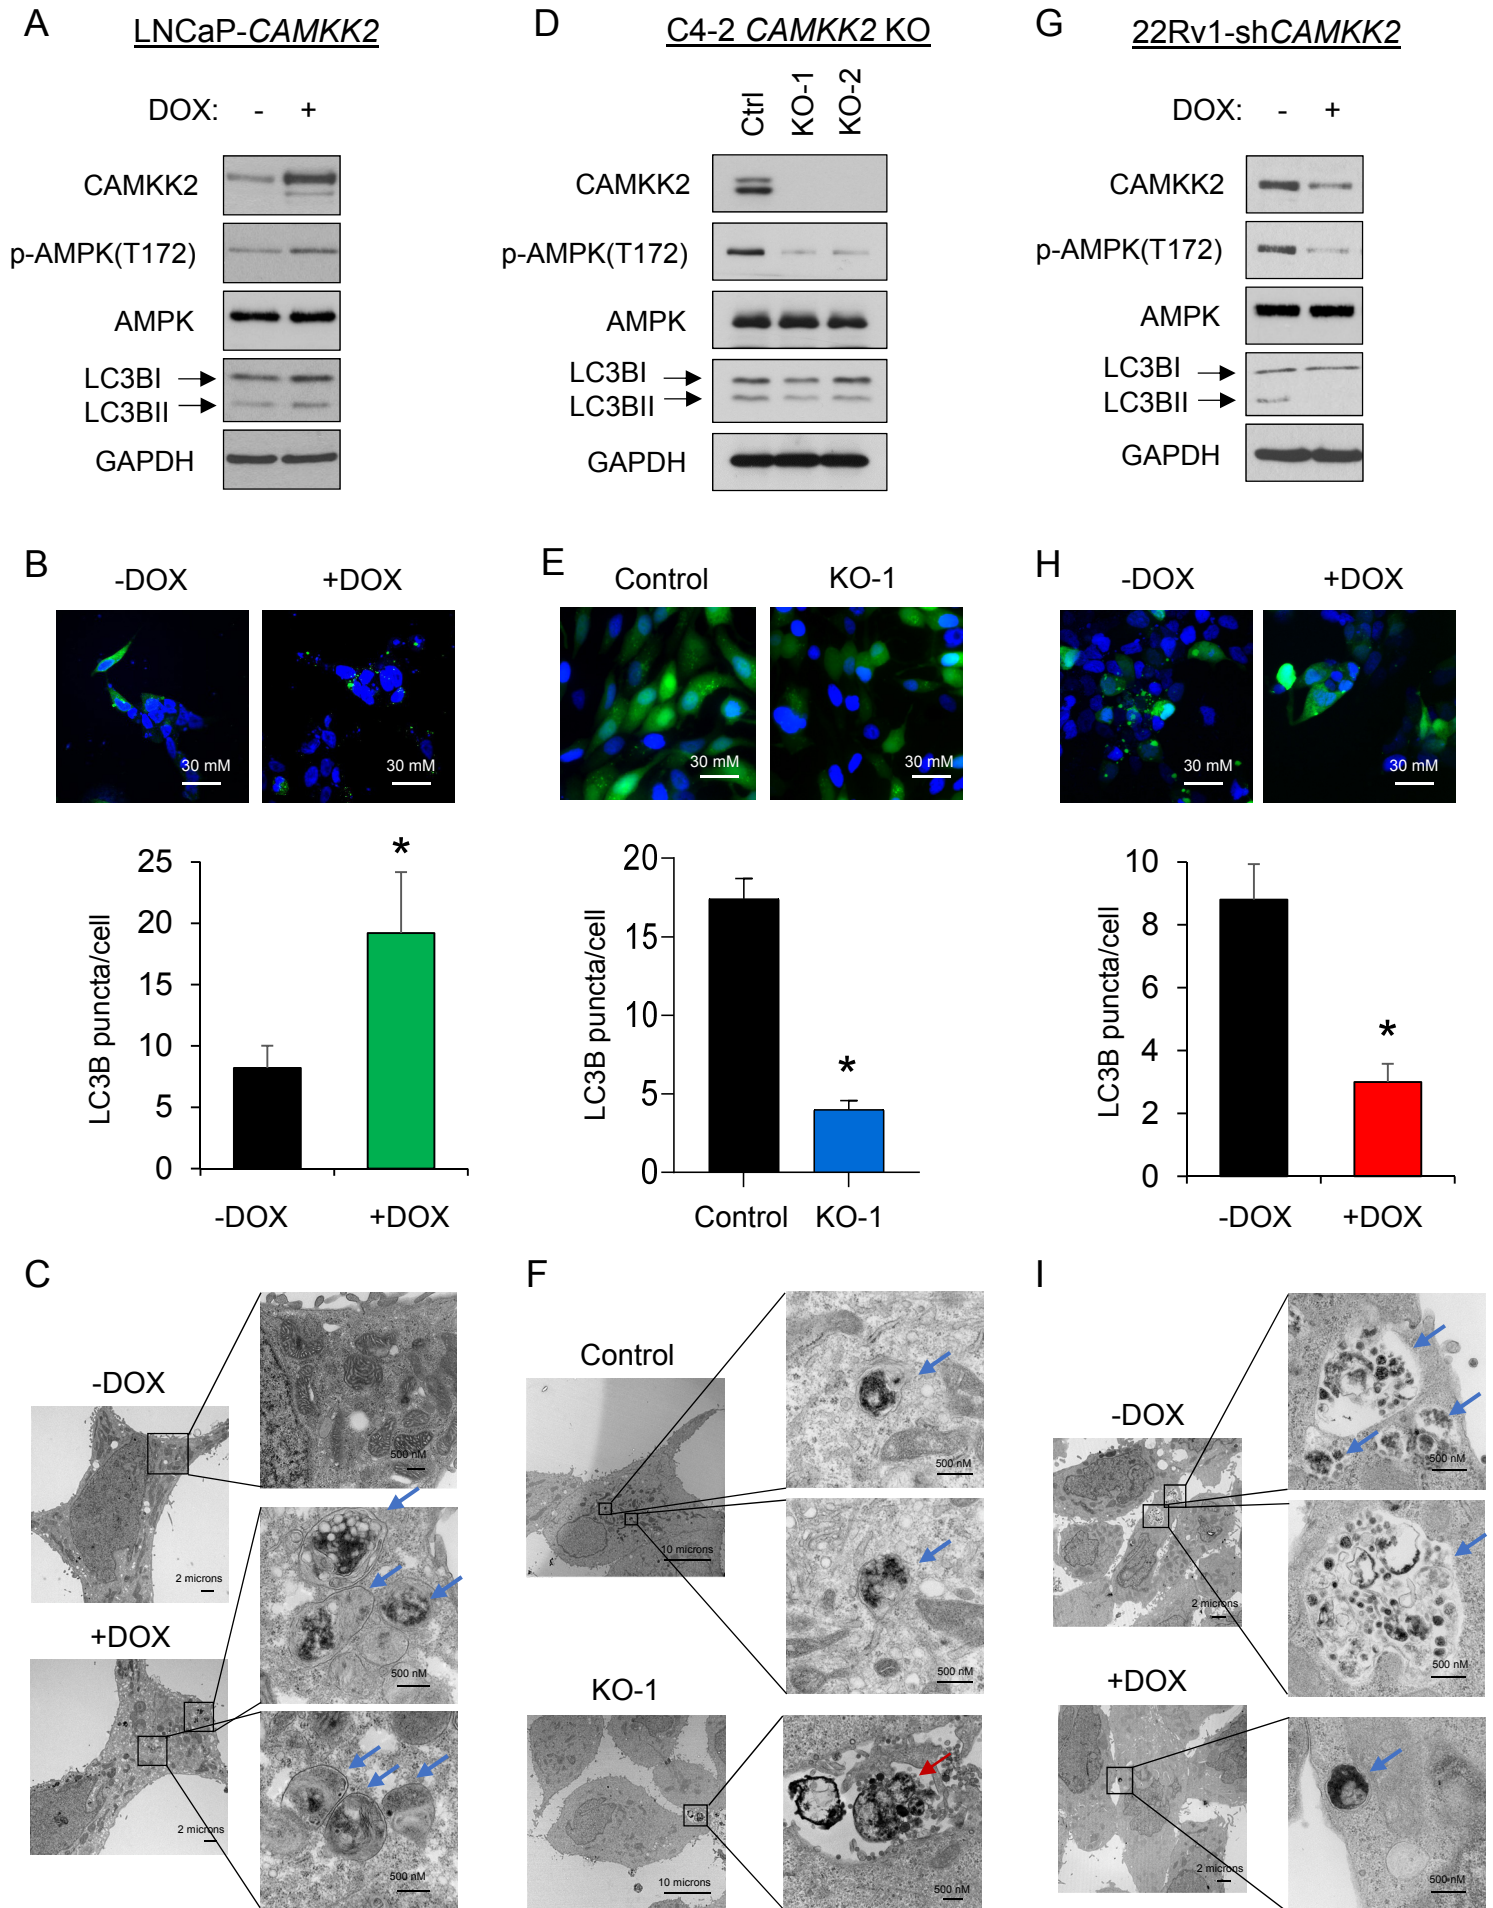

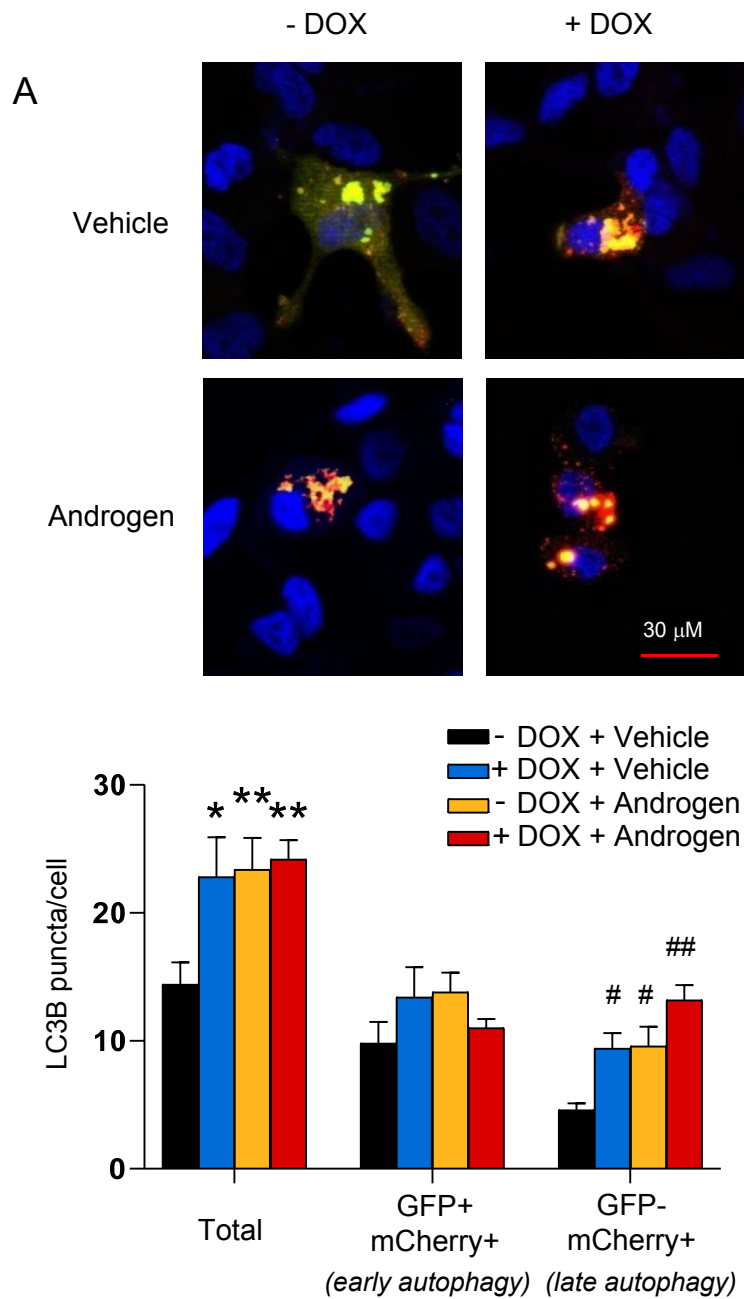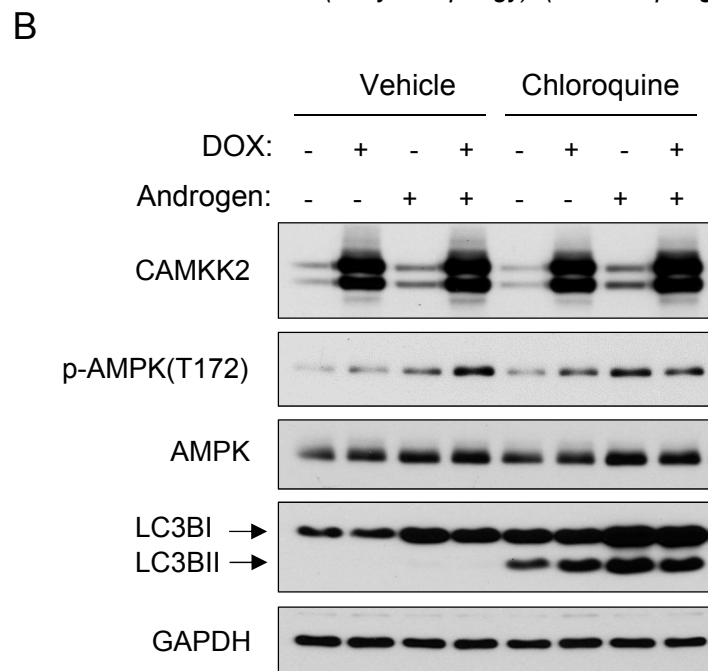

# Figure 4

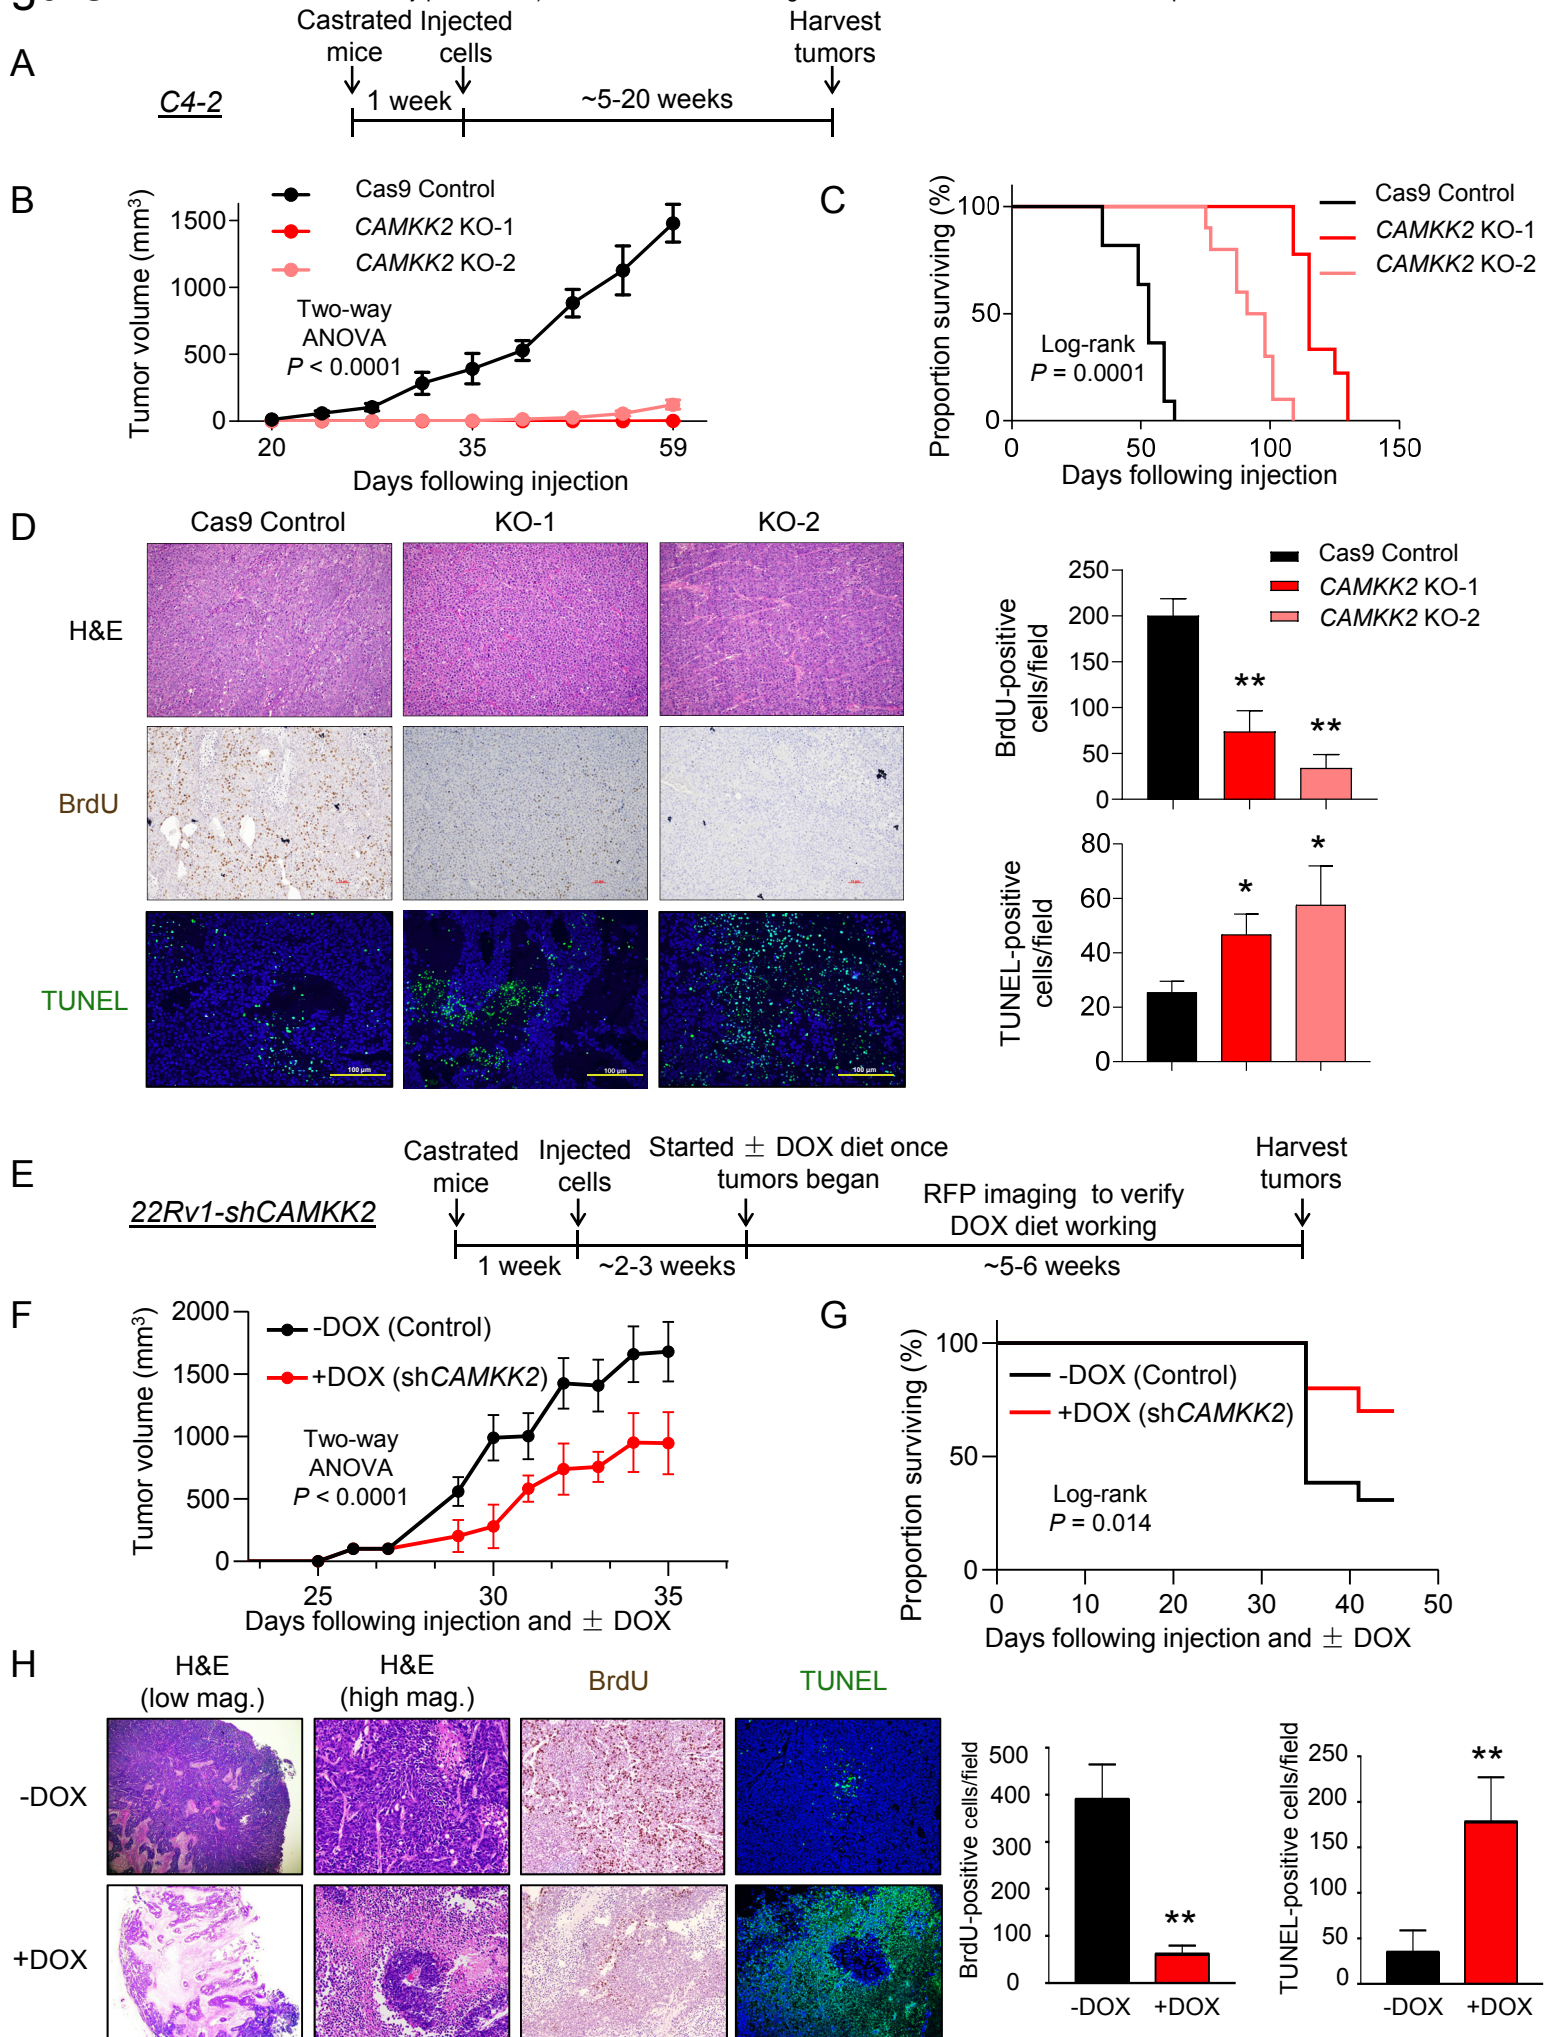

# Figure 5

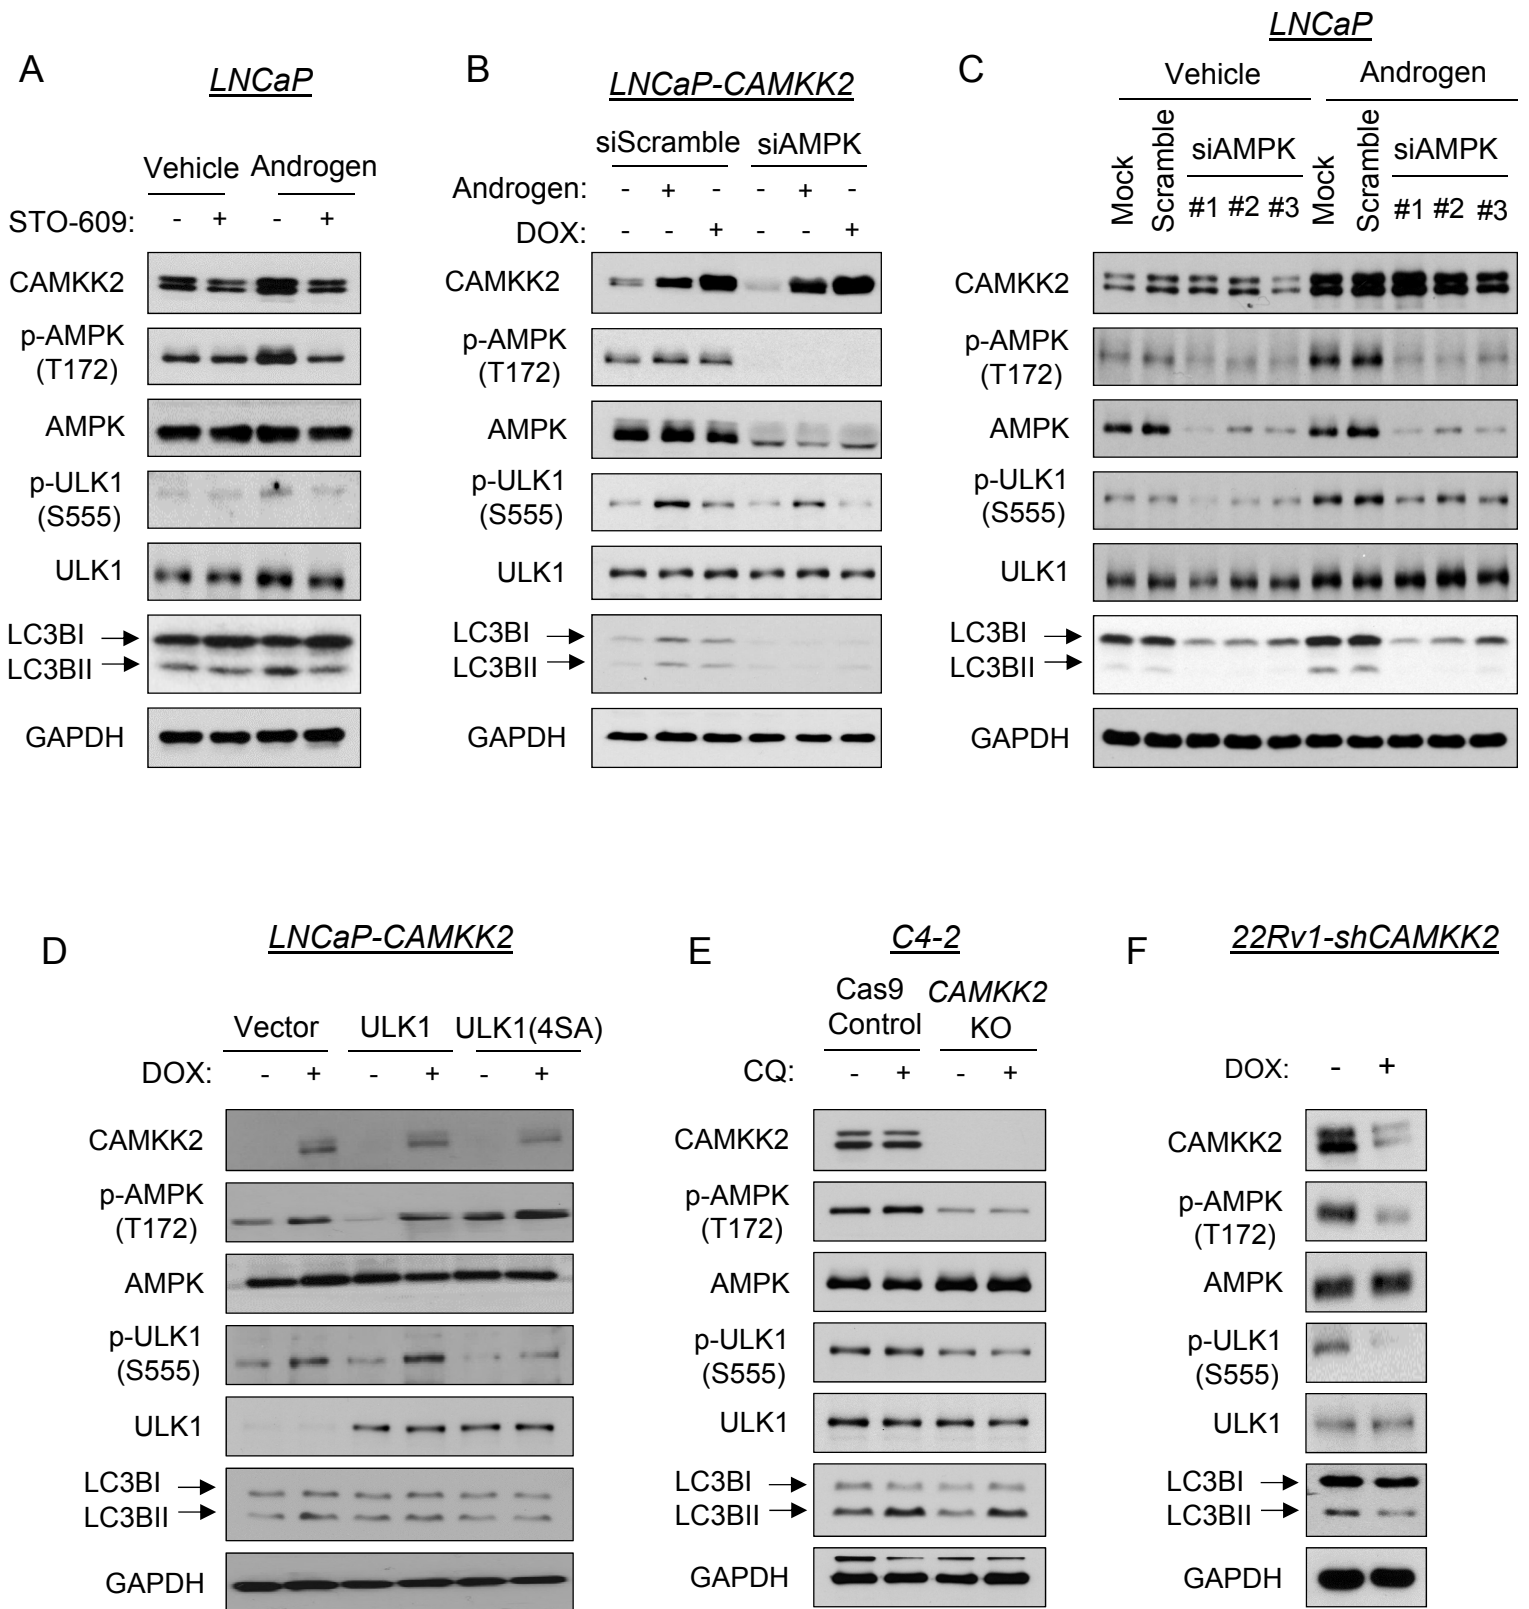



# Figure 6

A

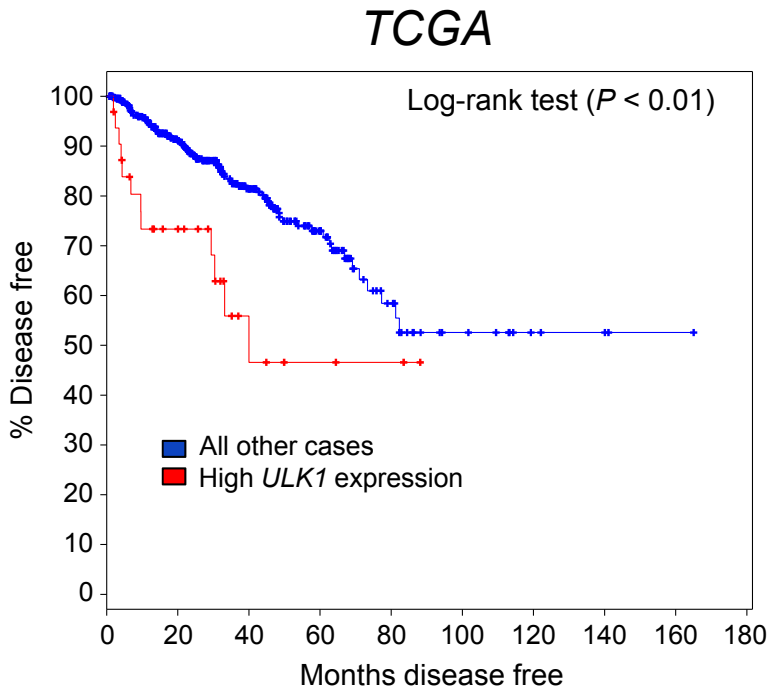

B

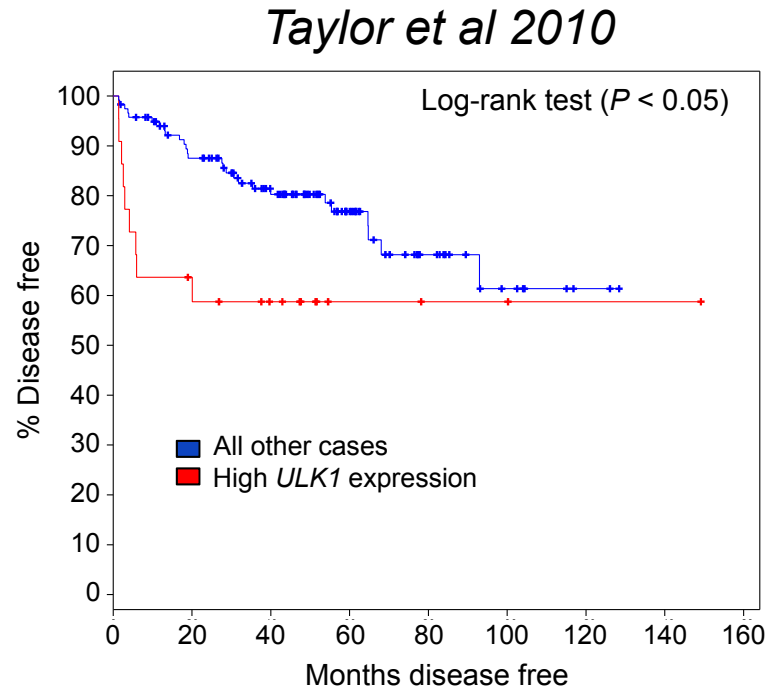

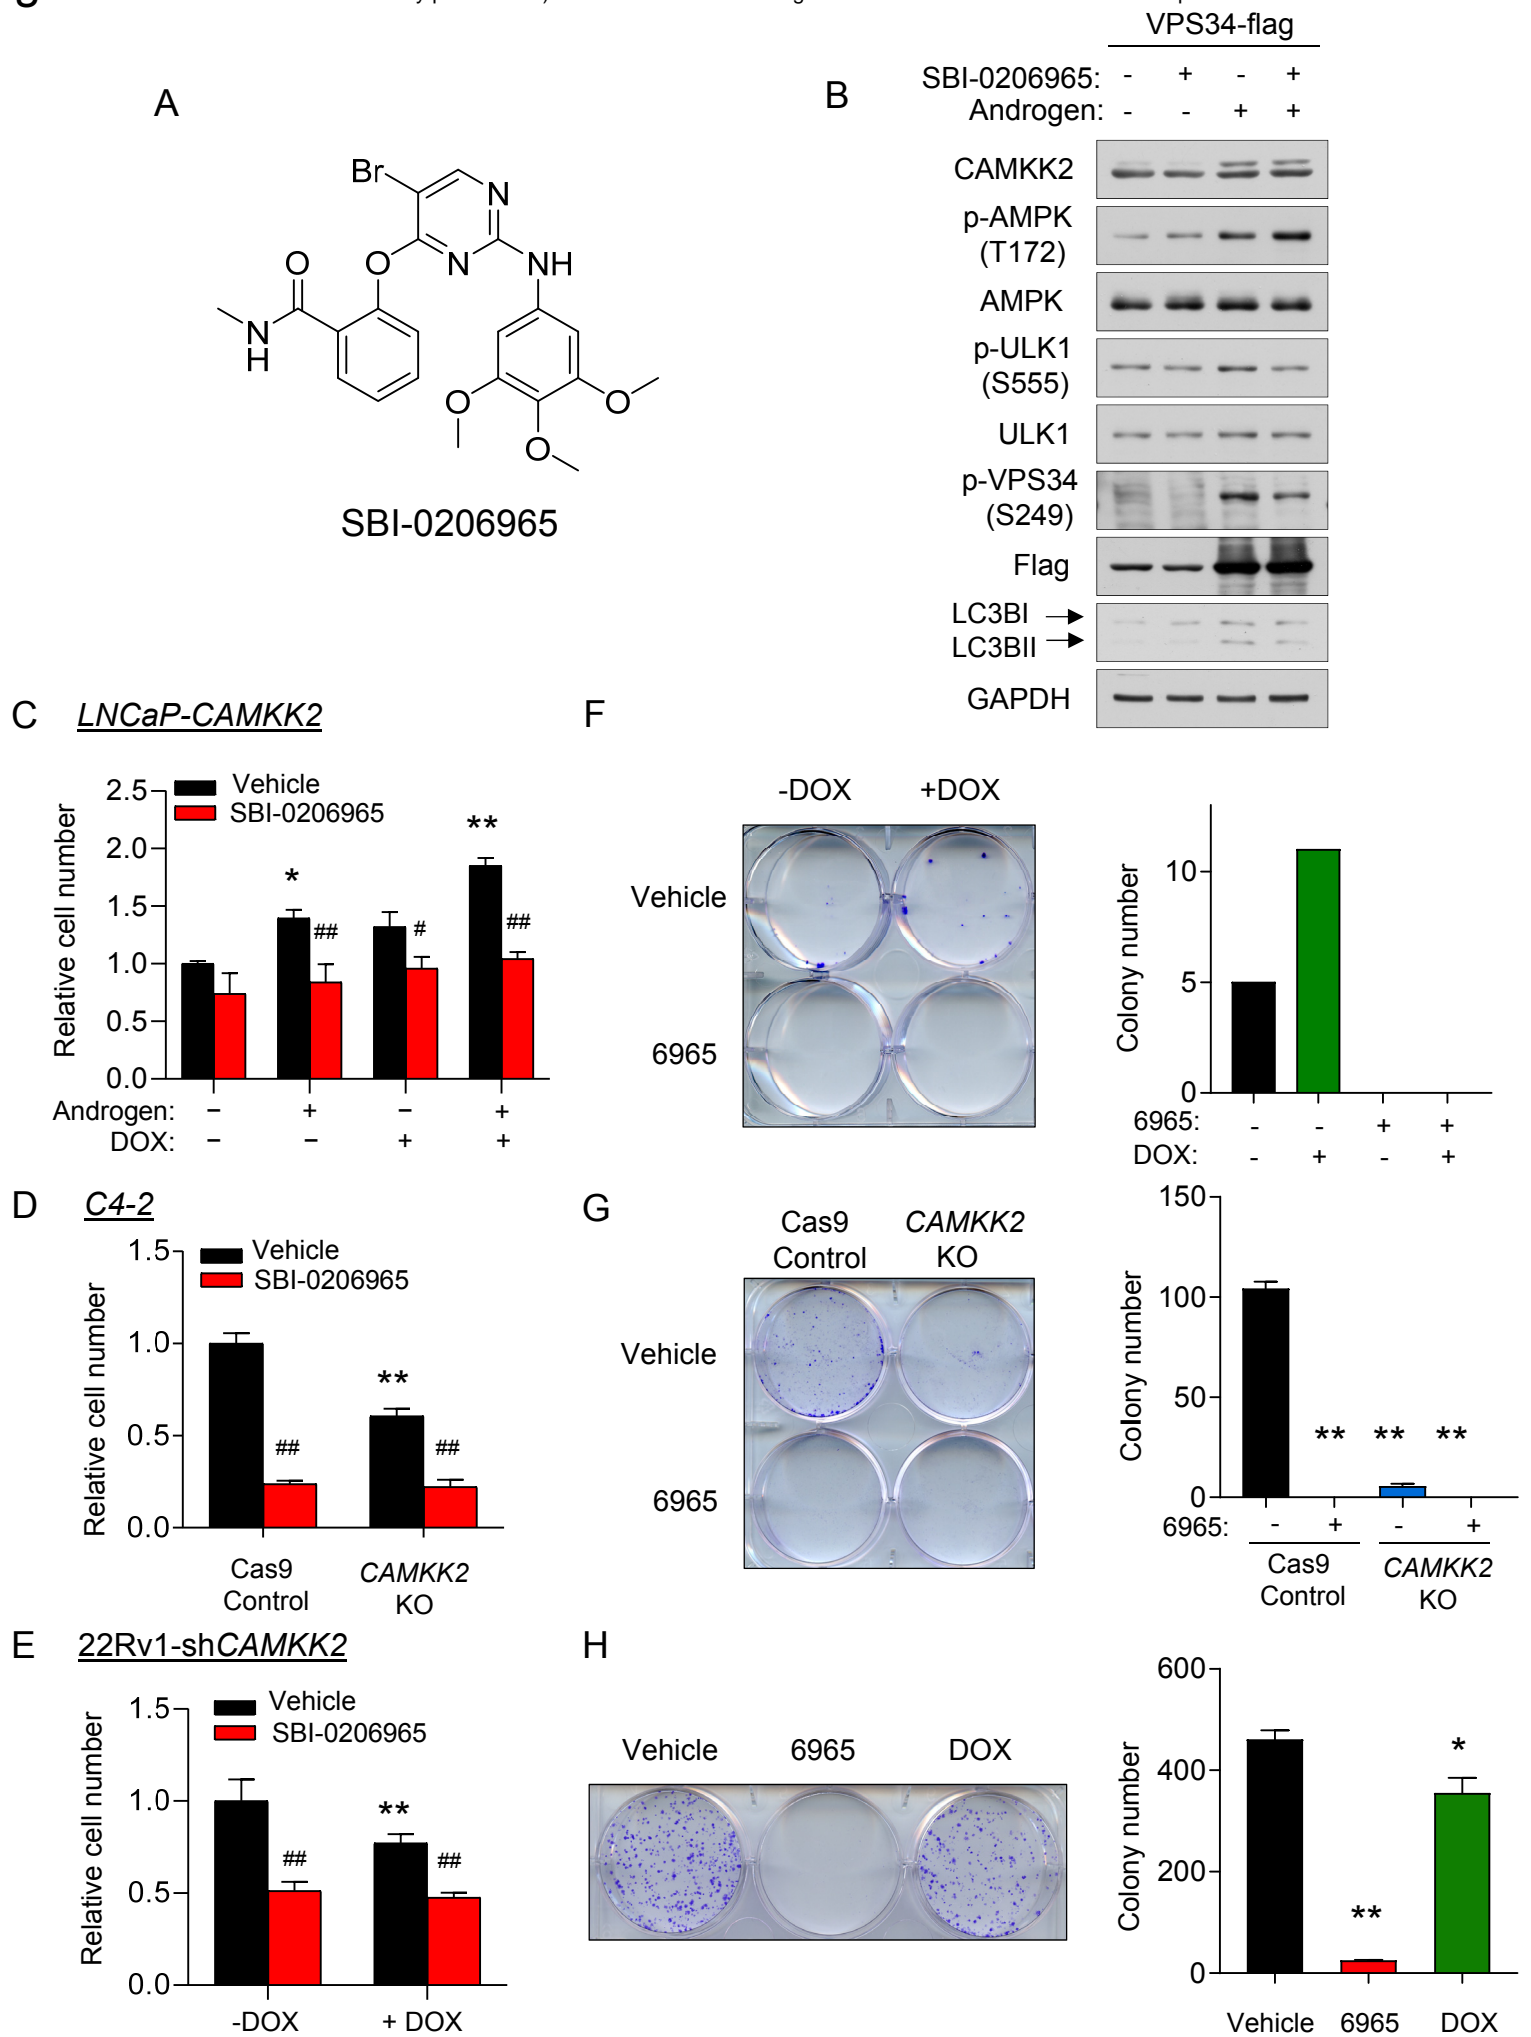

# Figure 8

bioRxiv preprint doi: <https://doi.org/10.1101/2020.06.02.130088>; this version posted June 3, 2020. The copyright holder for this preprint (which was not certified by peer review) is the author/funder. All rights reserved. No reuse allowed without permission.

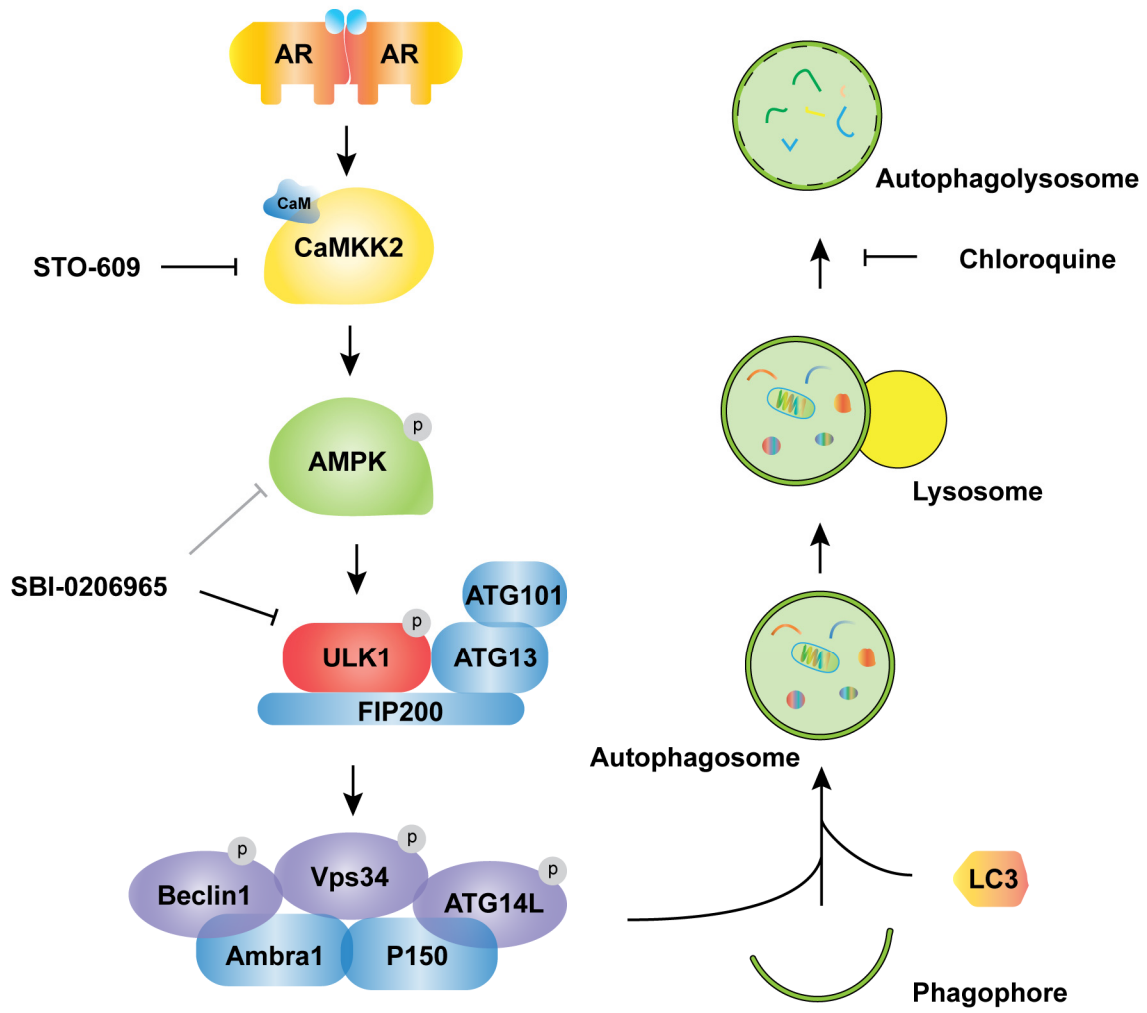

Source: https://www.biorxiv.org/content/10.1101/2020.06.02.130088v1.full.pdf
